# Supplementary material for: Bioactive Metabolites from Aspergillus niger Associated with Moringa oleifera: Potential for Anti-Infective Agents
Source: Research Square preprint supplement (doi:10.21203/rs.3.rs-5322575/v1), 2024-11-06
Supplement: Supplementary file 1 [file 8eb60cf092d2c2163e4929e4.docx]

# ITS1 and ITS4 rDNA Sequences of Fungal Isolate GS

**Table S1: Sequences of ITS1 and ITS4 rDNA Regions of Fungal Isolate GS**

| >GS_F  TGGTCTTACCGAGTGCGGGTCCTTTGGGCCCAACCTCCCATCCGTGYYTATTATACCCTG  TTGCTTCGGCGGGCCCGCCGCTTGTCGGCCGCCGGGGGGGCGCCTTTGCCCCCCGGGCCCGTGCCCGCCGGAGACCCCAACACGAACACTGTCTGAAAGCGTGCAGTCTGAGTTGATTGAATGCAATCAGTTAAAACTTTCAACAATGGATCTCTTGGTTCCGGCATCGATGAAGAACGCAGCGAAATGCGATAACTAATGTGAATTGCAGAATTCAGTGAATCATCGAGTCTTTGAACGCACATTGCGCCCCCTGGTATTCCGGGGGGCATGCCTGTCCGAGCGTCATTGCTGCCCTCAAGCCCGGCTTGTGTGTTGGGTCGCCGTCCCCCTCTCCGGGGGGACGGGCCCGAAAGGCAGCGGCGGCACCGCGTCCGATCCTCGAGCGTATGGGGCTTTGTCACATGCTCTGTAGGATTGGCCGGCGCCTGCCGACGTTTTCCAACCATTTTTTCCAGGTTGACCTCGGATCAGGTAGGGATACCCGCTGAACTTAAGCATATCATWAARGSCGGGRGGAAA |
| --- |
| >GS_R  AMWMGCGGGTATCCCTACCTGATCCGAGGTCAACCTGGAAAAMWTGGTTGGAAAACGTCGGCAGGCGCCGGCCAATCCTACAGAGCATGTGACAAAGCCCCATACGCTCGAGGATCGGACGCGGTGCCGCCGCTGCCTTTCGGGCCCGTCCCCCCGGAGAGGGGGACGGCGACCCAACACACAAGCCGGGCTTGAGGGCAGCAATGACGCTCGGACAGGCATGCCCCCCGGAATACCAGGGGGCGCAATGTGCGTTCAAAGACTCGATGATTCACTGAATTCTGCAATTCACATTAGTTATCGCATTTCGCTGCGTTCTTCATCGATGCCGGAACCAAGAGATCCATTGTTGAAAGTTTTAACTGATTGCATTCAATCAACTCAGACTGCACGCTTTCAGACAGTGTTCGTGTTGGGGTCTCCGGCGGGCACGGGCCCGGGGGGCAAAGGCGCCCCCCCGGCGGCCGACAAGCGGCGGGCCCGCCGAAGCAACAGGGTATAATAGACACGGATGGGAGGTTGGGCCCAAAGGACCCGCACTCGGTAATGATCCTTCCGCAKCYCMCCCCTACGGAARGGGATCATTACCGAGTGSGGGTCCTTTGGGCCAACTCCATCGTGTCTATTATACCTGTTGCTTCGCGGGCGCGCTGTSGGCGCGGGGGGGGGGGSCTTTKCCGGGGCSGKGCGSSGGRMMACCMAMAMRKRTKKTWTAT |

# Cultivation Parameters Data

**Table S2: Comparison of solvent extraction efficiency from**

**fungal cultures in GPPYSG and SDB media across**

**different durations and volumes**

| Medium | Solvent | Medium Volume (L) | Time (Days) | Mean Recovery (mg) |
| --- | --- | --- | --- | --- |
| GPPYSG | Hexane | 2 | 8 | 11.92 |
| GPPYSG | Ethyl acetate | 2 | 8 | 365.8 |
| GPPYSG | Butanol | 2 | 8 | 1253.66 |
| SDB | Hexane | 1 | 13 | 16.1 |
| SDB | Ethyl acetate | 1 | 13 | 494.2 |
| SDB | Butanol | 1 | 13 | 1693.7 |

***SDB: Sabouraud Dextrose Broth, GPPYSG: Glucose, Peptone,***

***Potassium Phosphate Monobasic, Yeast Extract, Sodium Chloride,***

***and Glycerol, Hexane: n-hexane, Butanol: n-butanol***

# Nutrient Medium and Volume Specifications Data

**Table S3: Bioactivity Screening and Extract Yield of Fungal Cultivates in GPPYSG and SDB Media Across Multiple**

**Solvent Extracts and Test Organisms**

| Medium | Extract | Bioactivity | Test Organism | Bio Result | Medium Volume | Extract Yield |
| --- | --- | --- | --- | --- | --- | --- |
| SDB | Hex | Antifungal activity | Multiple (7 organisms) | na | 1 | 16.1 |
| SDB | Hex | Antibacterial activity | Multiple (5 organisms) | na | 1 | 16.1 |
| SDB | Hex | Antioxidant activity | DPPH | - | 1 | 16.1 |
| SDB | EtoAc | Antifungal activity | Multiple (7 organisms) | + / - | 1 | 494.2 |
| SDB | EtoAc | Antibacterial activity | Multiple (5 organisms) | + | 1 | 494.2 |
| SDB | EtoAc | Antioxidant activity | DPPH | na | 1 | 494.2 |
| SDB | BuOH | Antifungal activity | Multiple (7 organisms) | - | 1 | 1693.7 |
| SDB | BuOH | Antibacterial activity | Multiple (5 organisms) | - | 1 | 1693.7 |
| SDB | BuOH | Antioxidant activity | DPPH | na | 1 | 1693.7 |
| GPPYSG | Hex | Antifungal activity | Multiple (7 organisms) | - | 2 | 11.92 |
| GPPYSG | Hex | Antibacterial activity | Multiple (5 organisms) | - | 2 | 11.92 |
| GPPYSG | Hex | Antioxidant activity | DPPH | - | 2 | 11.92 |
| GPPYSG | EtoAc | Antifungal activity | Multiple (7 organisms) | - | 2 | 365.8 |
| GPPYSG | EtoAc | Antibacterial activity | Multiple (5 organisms) | - | 2 | 365.8 |
| GPPYSG | EtoAc | Antioxidant activity | DPPH | - | 2 | 365.8 |
| GPPYSG | BuOH | Antifungal activity | Multiple (7 organisms) | - | 2 | 1253.66 |
| GPPYSG | BuOH | Antibacterial activity | Multiple (5 organisms) | - | 2 | 1253.66 |
| GPPYSG | BuOH | Antioxidant activity | DPPH | - | 2 | 1253.66 |
| SDB | Hex | Anti-inflammatory | ROS | - | 1 | 16.1 |
| SDB | EtoAc | Anti-inflammatory | ROS | - | 1 | 494.2 |
| SDB | BuOH | Anti-inflammatory | ROS | - | 1 | 1693.7 |
| GPPYSG | Hex | Anti-inflammatory | ROS | - | 2 | 11.92 |
| GPPYSG | EtoAc | Anti-inflammatory | ROS | - | 2 | 365.8 |
| GPPYSG | BuOH | Anti-inflammatory | ROS | - | 2 | 1253.66 |
| SDB | Hex | Anti-leishmanial | L. Tro-ma-do | - | 1 | 16.1 |
| SDB | EtoAc | Anti-leishmanial | L. Tro-ma-do | - | 1 | 494.2 |
| SDB | BuOH | Anti-leishmanial | L. Tro-ma-do | - | 1 | 1693.7 |
| GPPYSG | Hex | Anti-leishmanial | L. Tro-ma-do | - | 2 | 11.92 |
| GPPYSG | EtoAc | Anti-leishmanial | L. Tro-ma-do | - | 2 | 365.8 |
| GPPYSG | BuOH | Anti-leishmanial | L. Tro-ma-do | - | 2 | 1253.66 |

***SDB: Sabouraud Dextrose Broth, GPPYSG: Glucose, Peptone, Potassium Phosphate Monobasic, Yeast Extract, Sodium Chloride, and Glycerol, Hex: n-hexane, BuOHl: n-butanol, EtoAc: ethyl acetate, DPPH: 2,2-diphenyl-1-picrylhydrazyl, ROS: reactive oxygen species, L. Tro-ma-do: Leishmaniasis tropica, major, donovani***

# Biological Activity Assessment

**Table S4: Bioactivity Profile of GS Fungus Extracts on Unique Extracts**

**and Total Tests Across Various Bioactivity Assessments**

| Biotest | Unique Extracts | Total Tests |
| --- | --- | --- |
| Anti-inflammatory activity | 3 | 3 |
| Anti-leishmanicidal activity | 3 | 3 |
| Antibacterial activity | 3 | 15 |
| Antifungal activity | 3 | 21 |
| Antioxidant activity | 3 | 3 |

# Mass Spectrometric and NMR Analysis Results

**
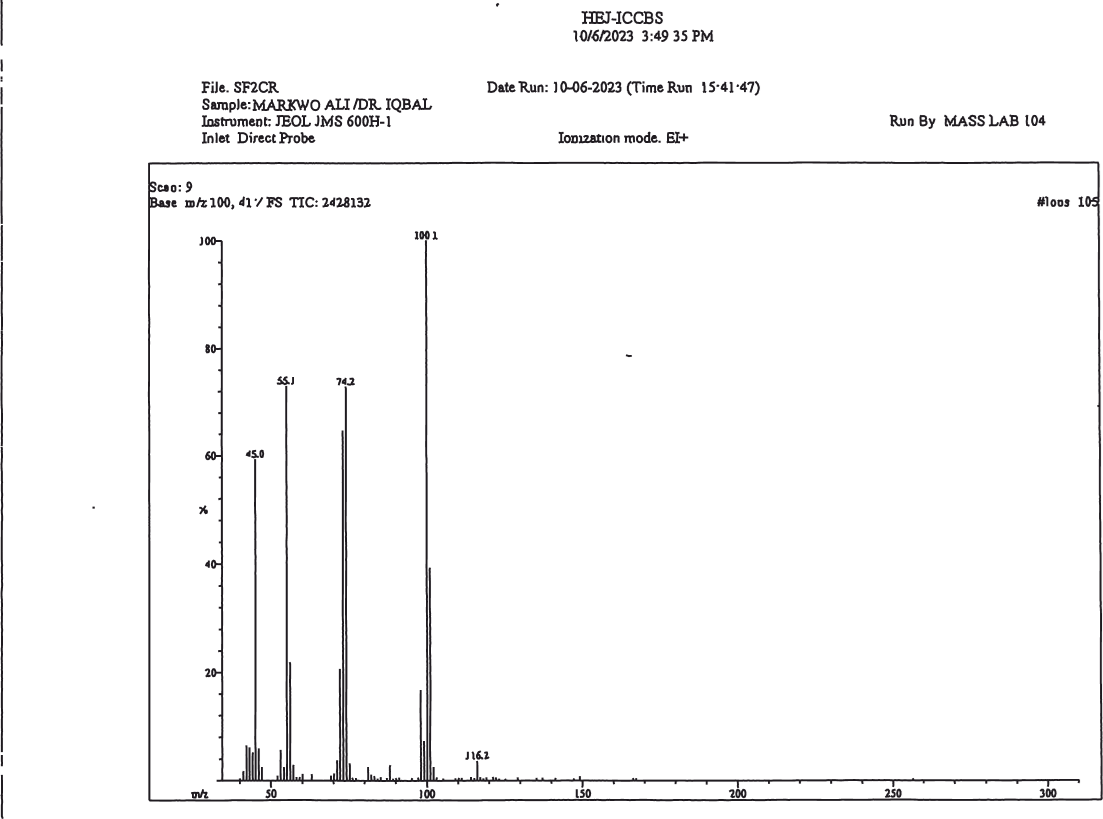
**

**Figure S1: Mass Spectrum of Compound 1 (SF2CR)**.The mass spectrum of SF2CR,acquired using a JEOL JMS 600H-1 instrument, displays prominent peaks at m/z 116.2, 100.1, 74.2, 55.1, and 45.0. The molecular ion (M+•) peak at m/z 118.0 is barely visible due to its instability.


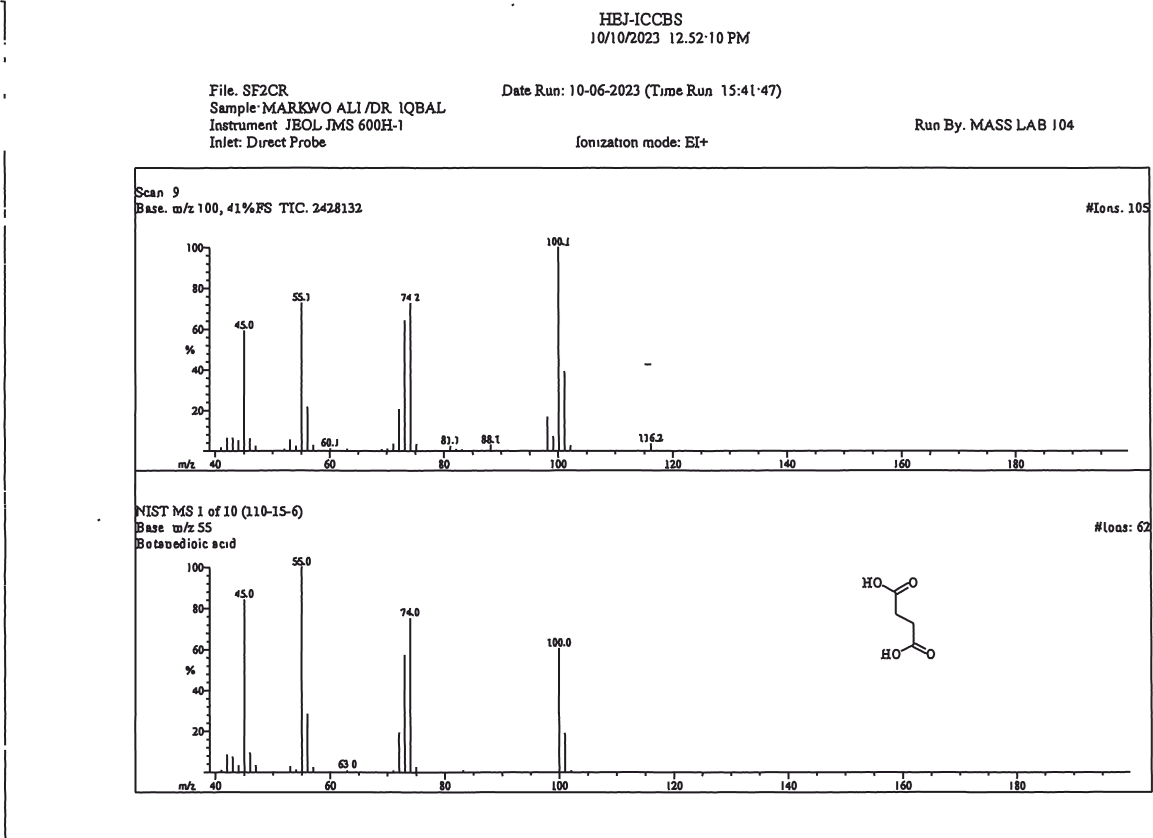


**Figure S2: Comparative Mass Spectrum Analysis of Compound 1 (SF2CR) with NIST Standard for Butanedioic Acid.** Comparison of the mass spectrum of SF2CR, obtained using a JEOL JMS 600H-1, with the NIST standard spectrum for butanedioic acid. Prominent peaks at m/z 118.0, 116.2, 100.1, 74.2, 55.1, and 45.0 suggest a close resemblance in the fragmentation pattern.


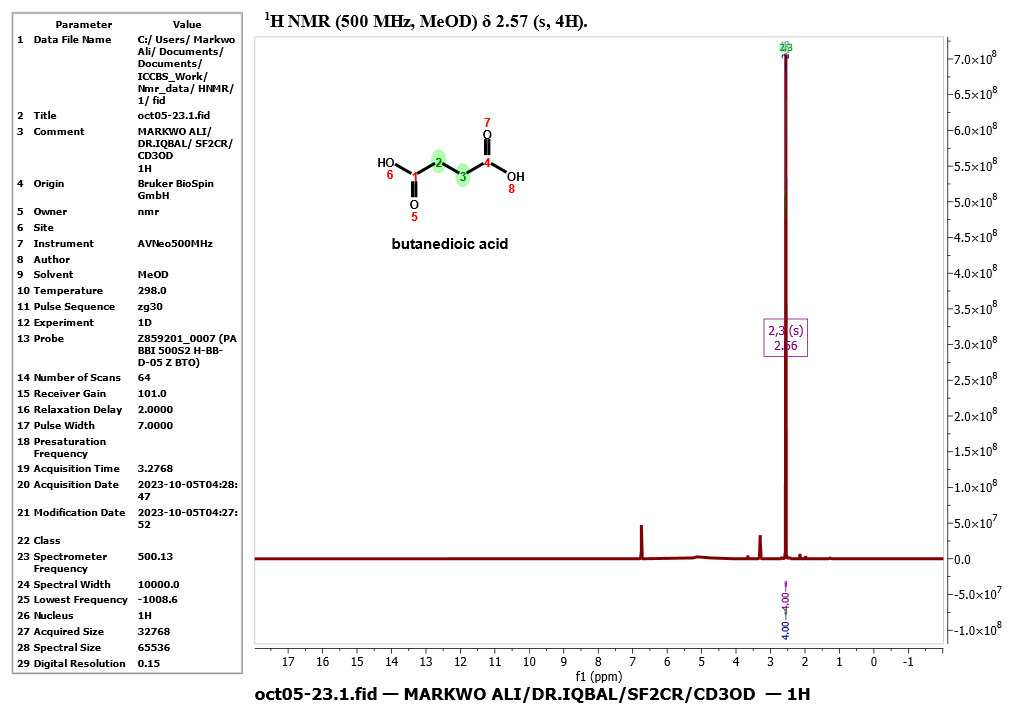


**Figure S3: Proton Spectrum of SF2CR in MeOD.** The proton spectrum of SF2CR in MeOD, acquired on a Bruker BioSpin GmbH instrument operating at 500 MHz, displays a singular peak at δ 2.57 ppm, corresponding to 4H. Spectral comparison with the NIST library suggests a close match with succinic acid.

**
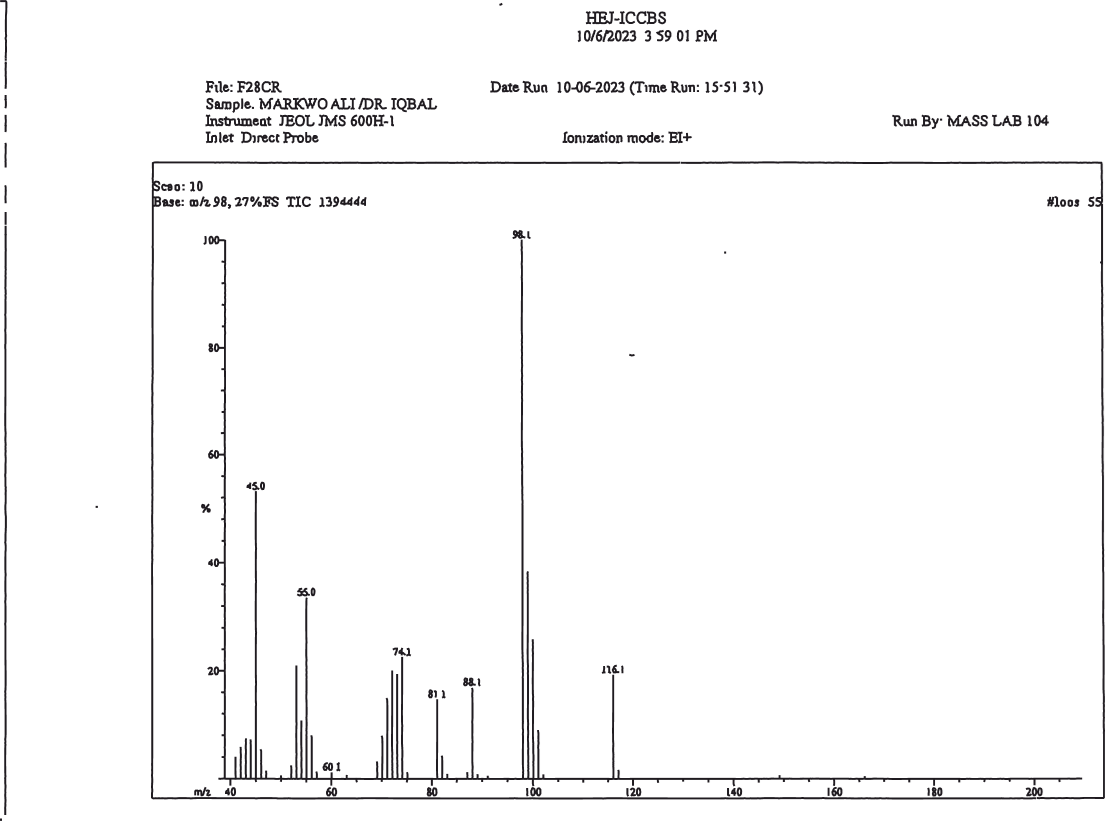
**

**Figure S4: Mass Spectrum of Compound 2 (F28CR).** The mass spectrum of F28CR, acquired using a JEOL JMS 600H-1 instrument, displays prominent peaks at m/z 116.1, 98.1, 88.1, 81.1, 74.1, 60.1, 55.0, and 45.0. The molecular ion (M+•) peak at m/z 118.0 is barely visible due to its instability.


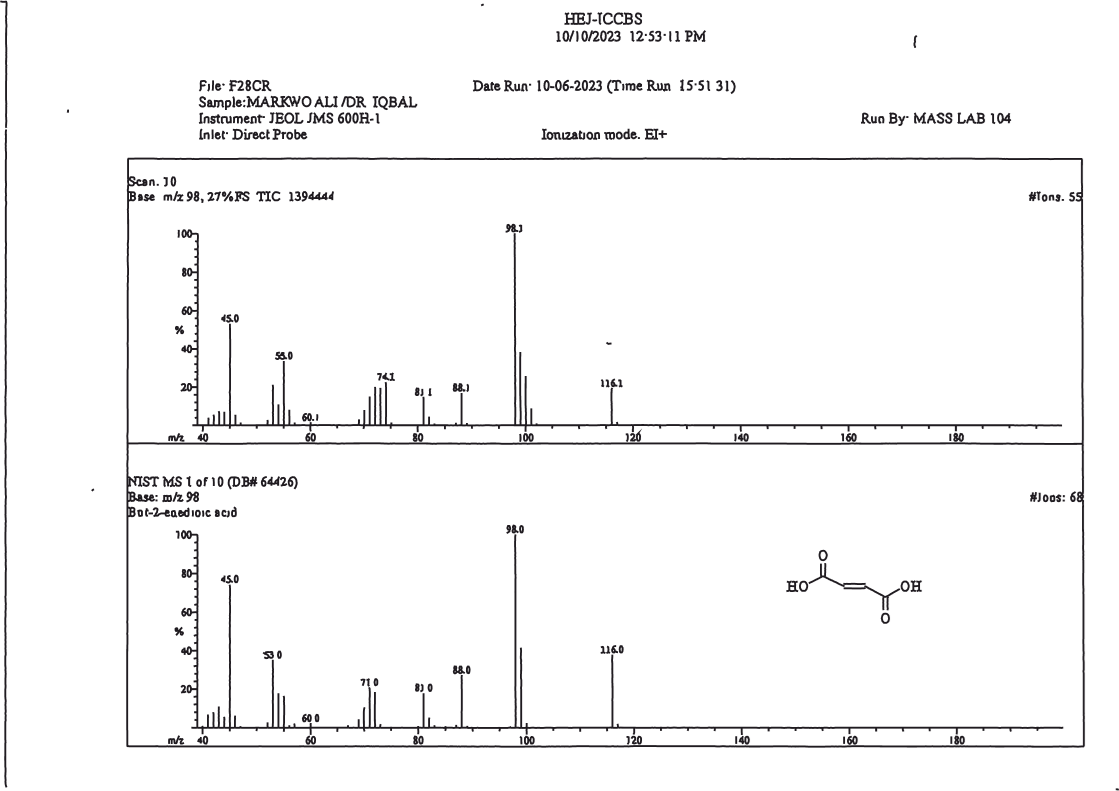


**Figure S5: Comparative Mass Spectrum Analysis of Compound 2 (F28CR) with NIST Standard for But-2-enedioic Acid**. Comparison of the mass spectrum of F28CR, obtained using a JEOL JMS 600H-1, with the NIST standard spectrum for but-2-enedioic acid. Prominent peaks at m/z 116.1, 98.1, 88.1, 81.1, 74.1, 60.1, 55.0, and 45.0 suggest a close resemblance in the fragmentation pattern.


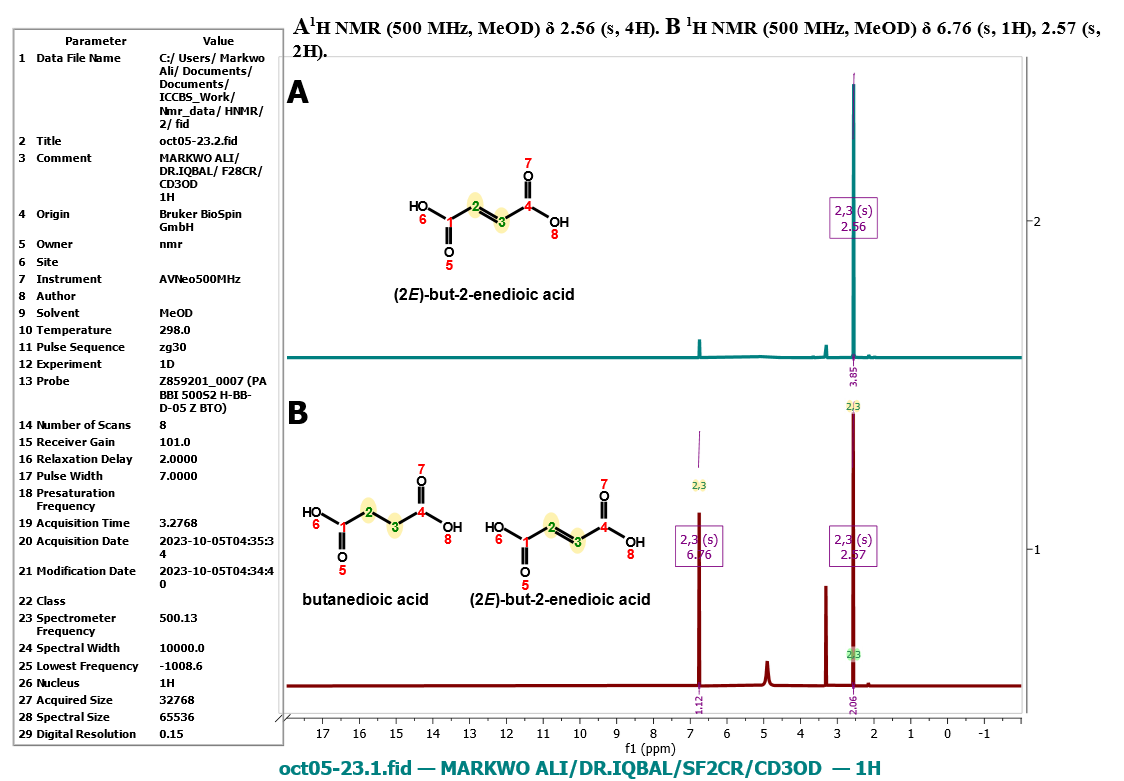


**Figure S6: Stacked Proton Spectra of SF2CR and F28CR**. Proton spectra of A: SF2CR and B: F28CR, recorded at 500 MHz in MeOD, are presented in a stacked format for direct comparison. The proton NMR spectrum of compound SF2CR in MeOD recorded at 500 MHz, shows a prominent singlet at δ 6.76 ppm corresponding to the olefinic protons of fumaric acid. An additional singlet at δ 2.57 indicates the presence of succinic acid, attributable to its methylene protons. This suggests that the F28CR sample contains a mixture of fumaric acid and succinic acid.


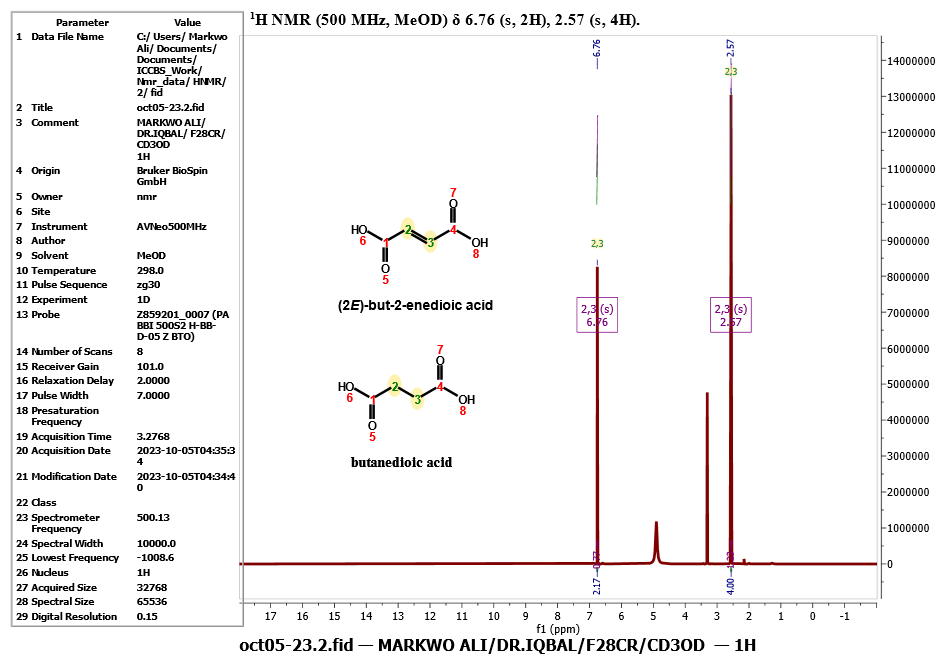


**Figure S7: Proton Spectrum of F28CR in MeOD.** The proton spectrum of F28CR in MeOD, acquired on a Bruker BioSpin GmbH instrument operating at 500 MHz, reveals peaks at δ 6.76 and δ 2.57 ppm, corresponding to 2H and 4H, respectively. Spectral comparison with the NIST library indicates a close resemblance to a mixture of fumaric acid and succinic acid.


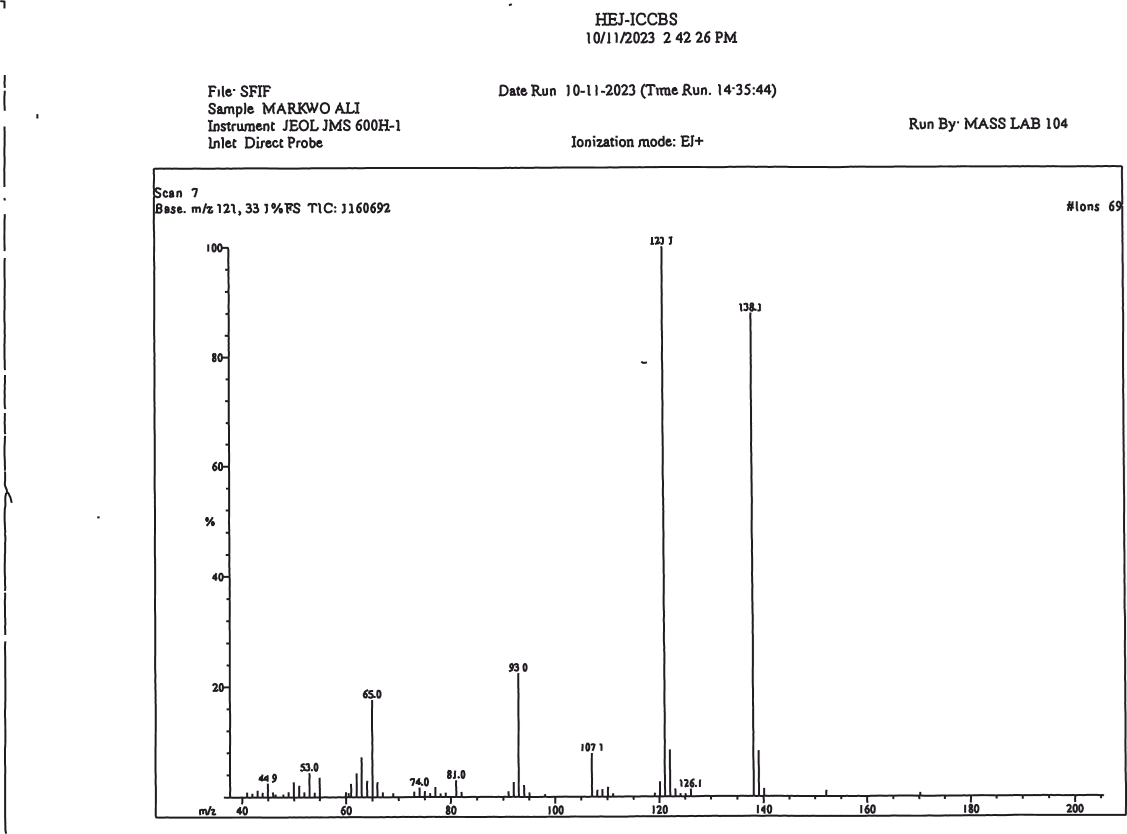


**Figure S8: Mass Spectrum of Compound 3 (SFIF) Acquired on a JEOL JMS 600H-1 Instrument**. The spectrum exhibits prominent peaks at m/z 138.1, 121.1, 126.1, 107.1, 93.0, 81.0, 74.0, 65.0, 53.0, and 44.9. The molecular ion (M+•) peak at m/z 138.1 was utilized for subsequent structural elucidation purposes.


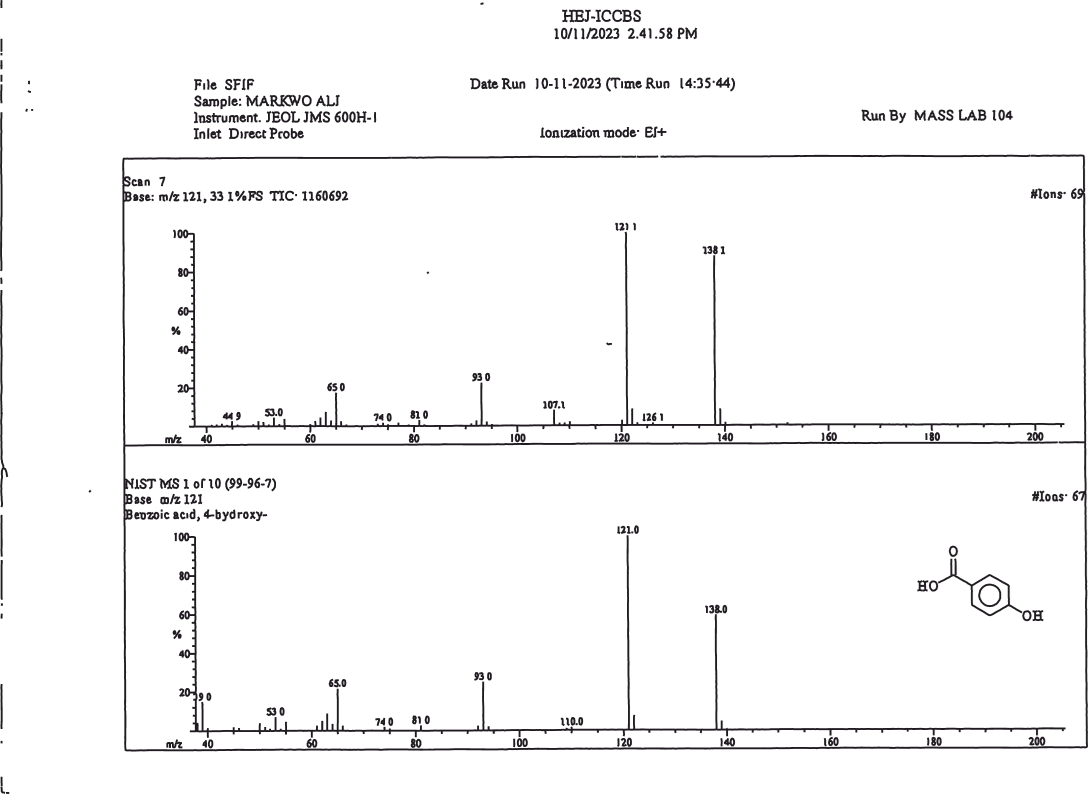


**Figure S9: Mass Spectrum of Compound 3 (SFIF) Acquired on a JEOL JMS 600H-1 Instrument.** The spectrum exhibits prominent peaks at m/z 138.1, 121.1, 126.1, 107.1, 93.0, 81.0, 74.0, 65.0, 53.0, and 44.9. The molecular ion (M+•) peak at m/z 138.1 was utilized for subsequent structural elucidation purposes. Spectral comparison with the NIST library indicates the best match as 4-hydroxybenzoic acid.


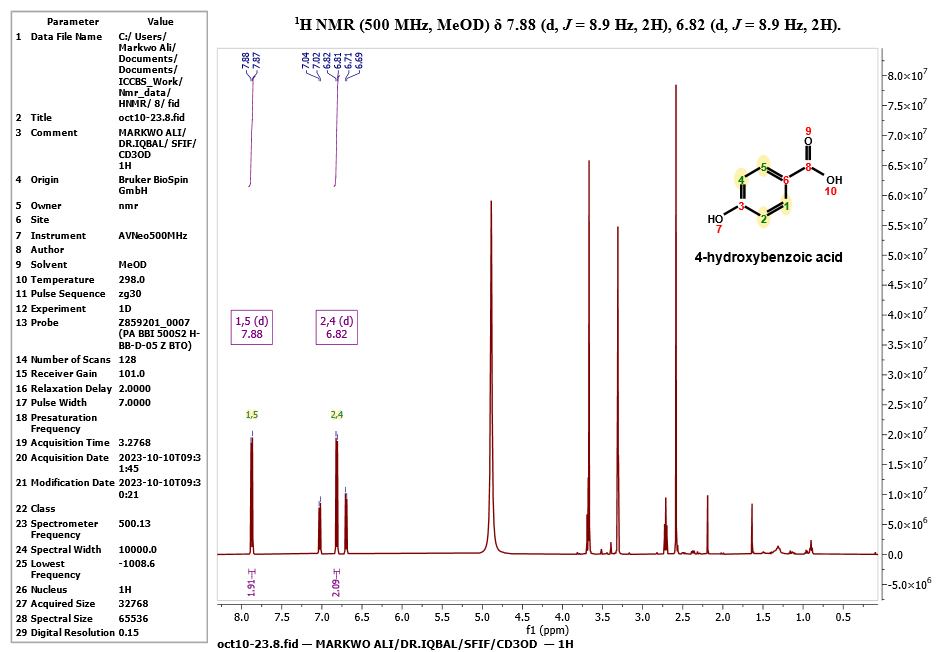


**Figure S10: Proton Spectrum of Compound SFIF in MeOD Acquired on an AVNeo Bruker BioSpin GmbH Instrument Operating at 500 MHz.** The spectrum exhibits peaks at δ 7.88 (d, J = 8.9 Hz, 2H) and δ 6.82 (d, J = 8.9 Hz, 2H), consistent with 4-hydroxybenzoic acid as suggested by the mass spectrum. Additional undetermined peaks may be attributed to sample impurities or other compounds.


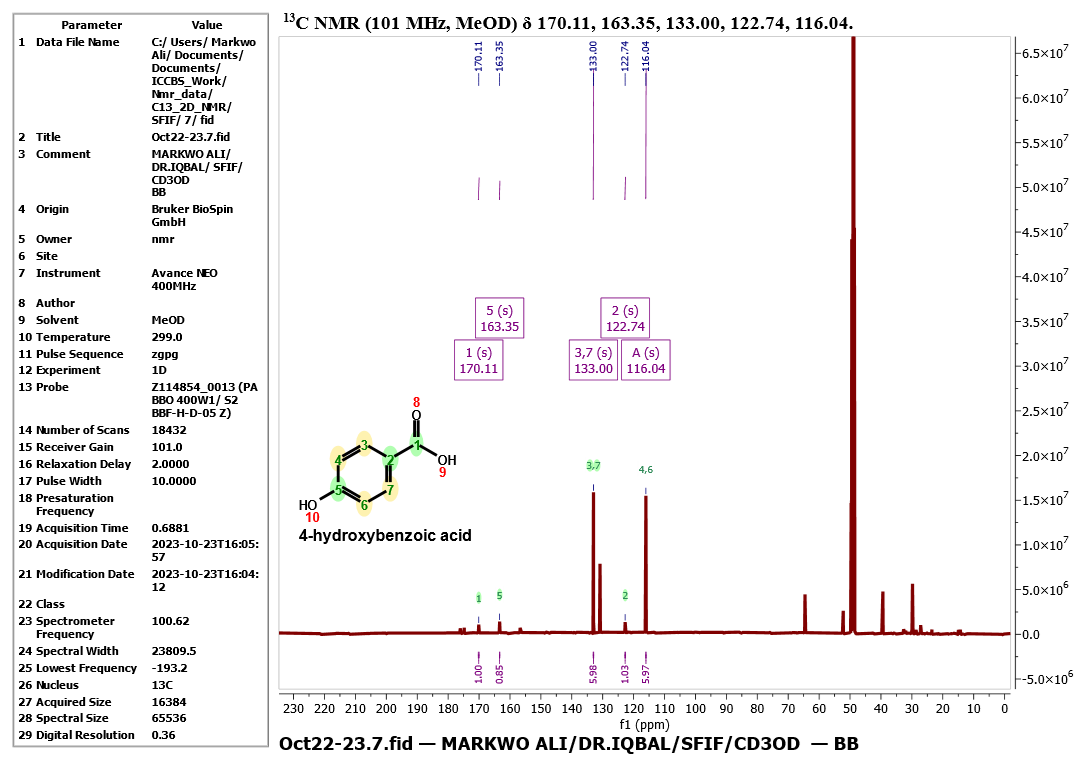


**Figure S11: Carbon-13 Spectrum of Compound SFIF in MeOD Acquired on an AVNeo Bruker BioSpin GmbH Instrument.** The spectrum exhibits peaks at σ 170.11, 163.35, 133.00, 122.74, and 116.04, consistent with 4-hydroxybenzoic acid as suggested by the mass spectrum. Additional minor peaks observed may be attributed to sample impurities or other compounds.


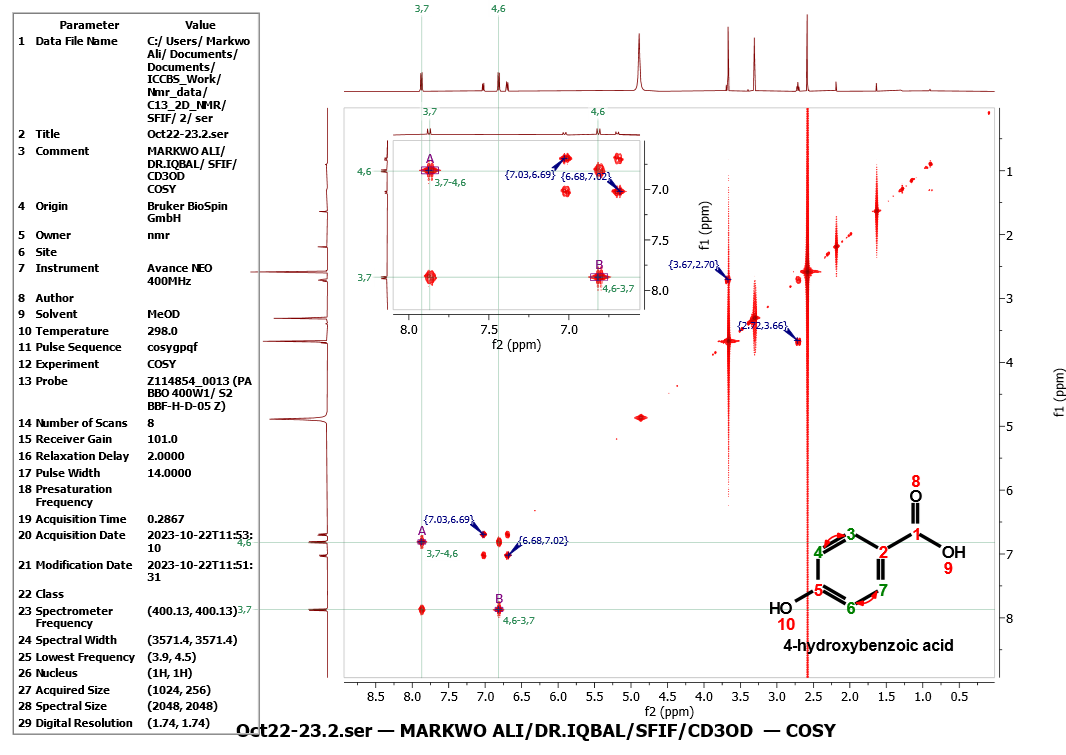


**Figure S12: COSY Spectrum of Compound SFIF in MeOD Acquired on an AVNeo Bruker BioSpin GmbH Instrument.** The COSY spectrum reveals correlations between protons at δ 7.88 (d, J = 8.9 Hz, 2H) and δ 6.82 (d, J = 8.9 Hz, 2H), consistent with 4-hydroxybenzoic acid as suggested by the mass spectrum. Additional correlation peaks may indicate the presence of impurities or other compounds in the sample.


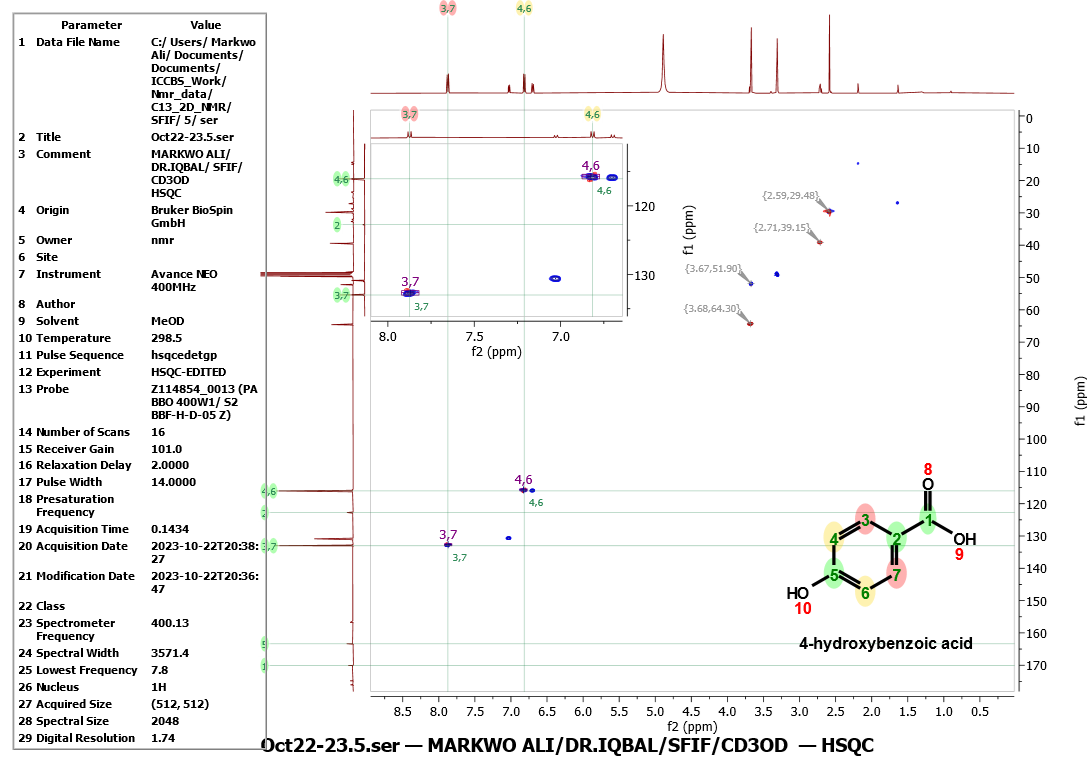


**Figure S13: HSQC Spectrum of Compound SFIF in MeOD Acquired on an AVNeo Bruker BioSpin GmbH Instrument.** The HSQC spectrum displays one-bond correlations between protons and carbons, with notable correlations at δ 7.88 (d, J = 8.9 Hz, 2H)/σ 122.74 and δ 6.82 (d, J = 8.9 Hz, 2H)/σ 116.04, consistent with 4-hydroxybenzoic acid as suggested by the mass spectrum. Additional correlation peaks may indicate the presence of impurities or other compounds in the sample.


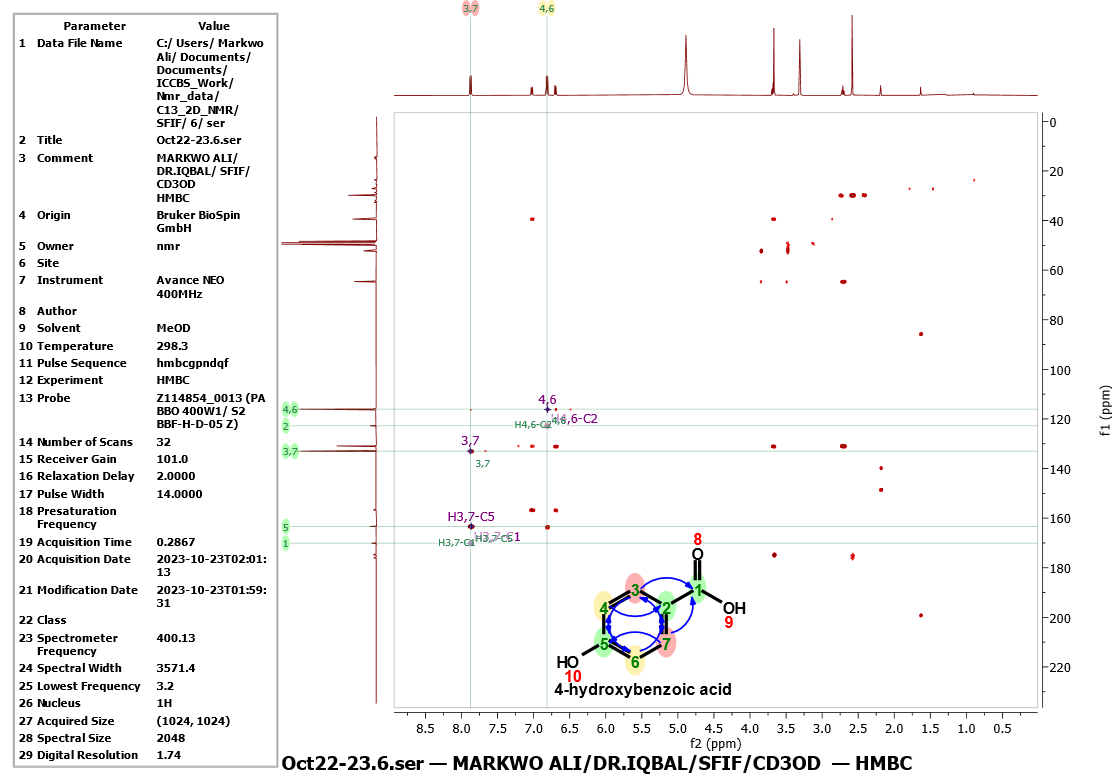


**Figure S14: HMBC Spectrum of Compound SFIF in MeOD Acquired on an AVNeo Bruker BioSpin GmbH Instrument.** The HMBC spectrum reveals long-range proton-carbon correlations, with notable correlations at δ 7.88 (d, J = 8.9 Hz, 2H)/σ 170.11 and δ 6.82 (d, J = 8.9 Hz, 2H)/σ 163.35, consistent with 4-hydroxybenzoic acid as suggested by the mass spectrum. Additional correlation peaks may indicate the presence of impurities or other compounds in the sample.


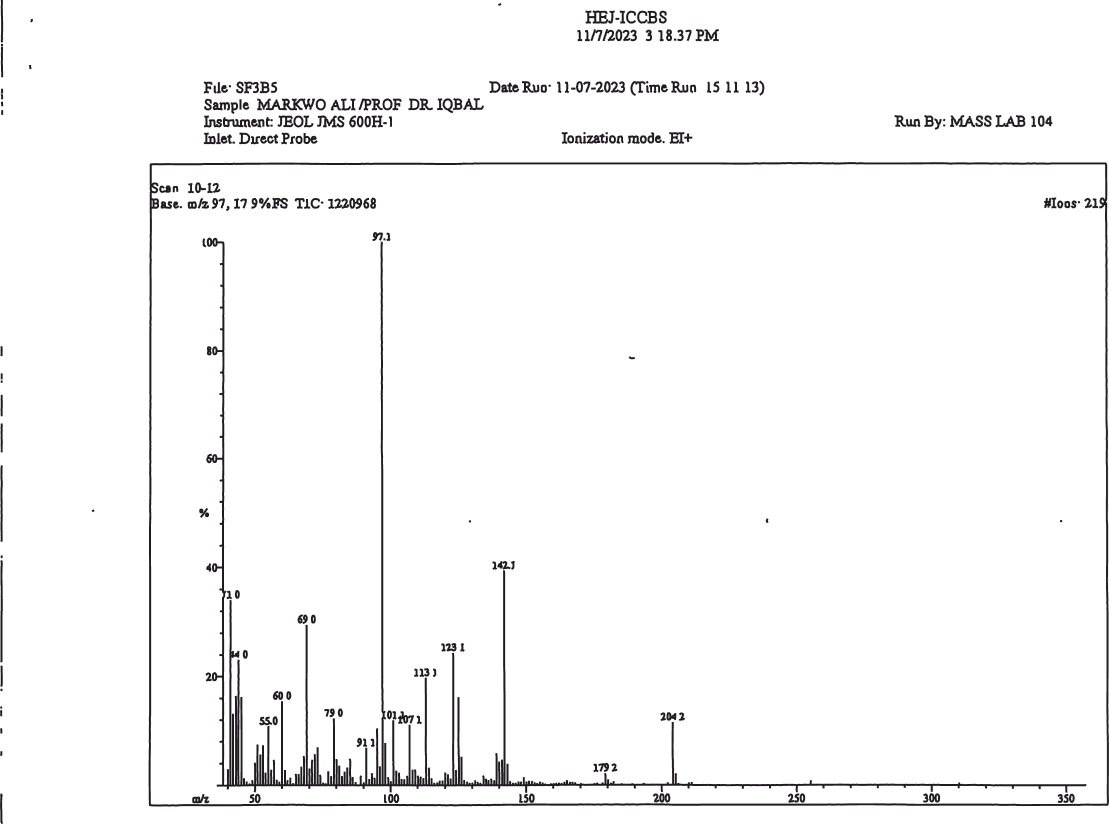


**Figure S15: Mass Spectrum of Compound 4 (SF3B5) Acquired on a JEOL JMS 600H-1 Instrument**. The spectrum exhibits prominent peaks at m/z 204.2, 179.2, 142.1, 123.1, 113.1, 107.0, 101.1, 97.1, 91.1, 79.0, 69.0, 60.0, 55.0, 51.0, and 41.0. The molecular ion (M+•) peak at m/z 142.1 was utilized for subsequent structural elucidation purposes.


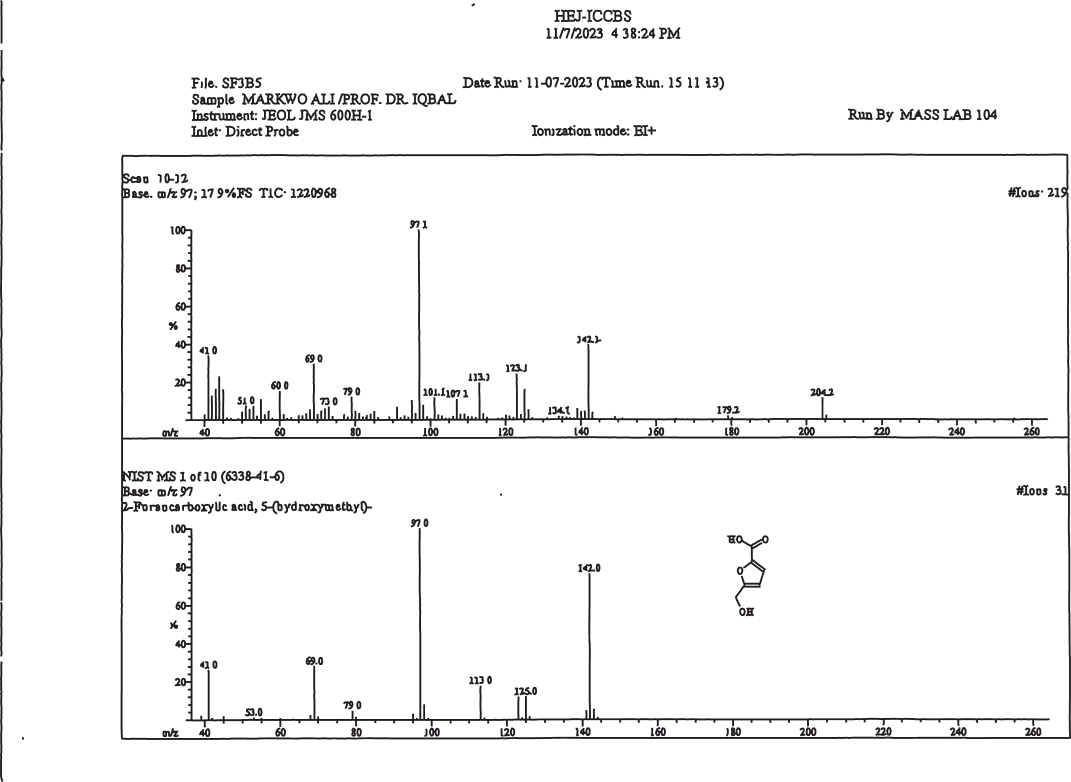


**Figure S16: Mass Spectrum of Compound 4 (SF3B5) Acquired on a JEOL JMS 600H-1 Instrument.** The spectrum displays prominent peaks at m/z 204.2, 179.2, 142.1, 123.1, 113.1, 107.0, 101.1, 91.1, 79.0, 69.0, 60.0, 55.0, 51.0, and 41.0. The molecular ion (M+•) peak is observed at m/z 142.1. Spectral matching on the NIST library reveals a close match with the compound 5-(hydroxymethyl) furan-2-carboxylic acid.


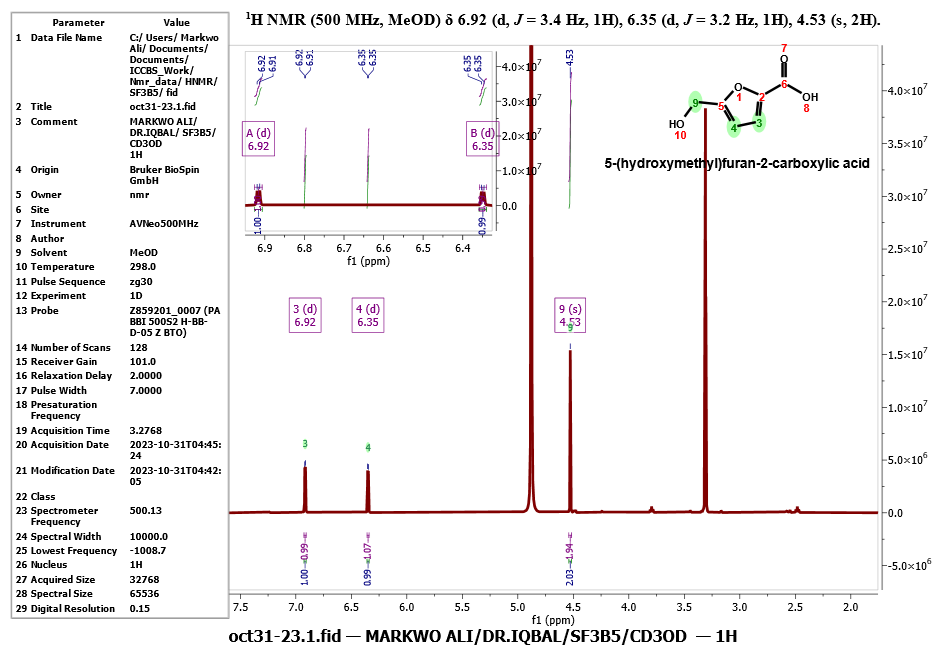


**Figure S17: Proton Spectrum of Compound 4 (SF3B5) in MeOD Acquired on an AVNeo Bruker BioSpin GmbH Instrument Operating at 500 MHz.** The spectrum exhibits peaks at δ 6.92 (d, 1H), 6.35 (d, 1H), and 4.53 (s, 2H). Spectral comparison with the NIST library indicates a strong similarity to 5-(hydroxymethyl) furan-2-carboxylic acid, suggesting that the observed peaks are characteristic of this compound's moieties.


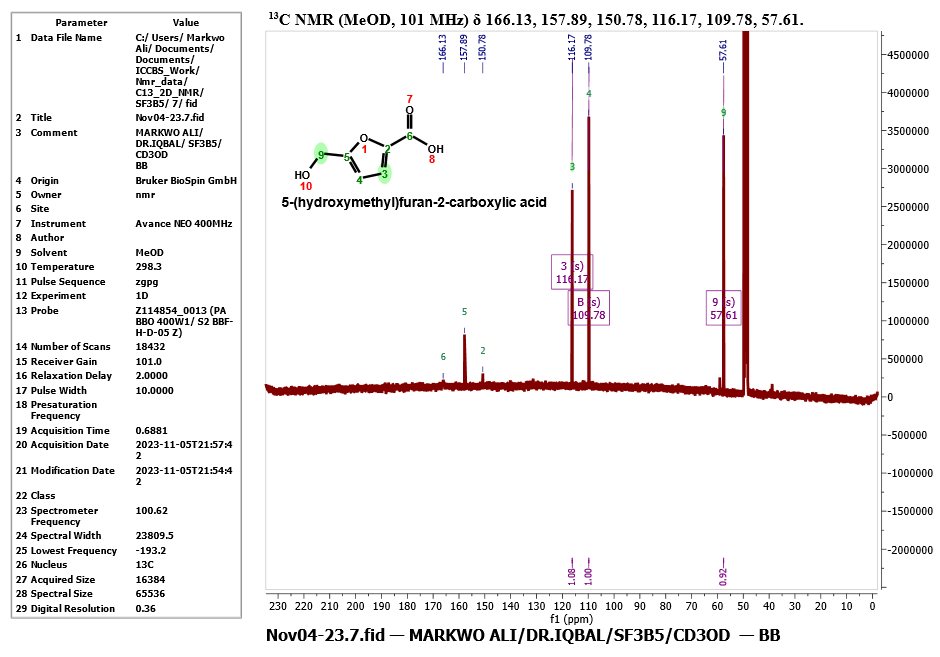


**Figure S18: Carbon-13 Spectrum of Compound 4 (SF3B5) in MeOD Acquired on an AVNeo Bruker BioSpin GmbH Instrument.** The spectrum exhibits peaks at σ 166.13, 157.89, 150.78, 116.17, 109.78, and 57.61. Spectral comparison with the NIST library indicates a strong similarity to 5-(hydroxymethyl) furan-2-carboxylic acid, suggesting that the observed peaks are characteristic of this compound's structural features.


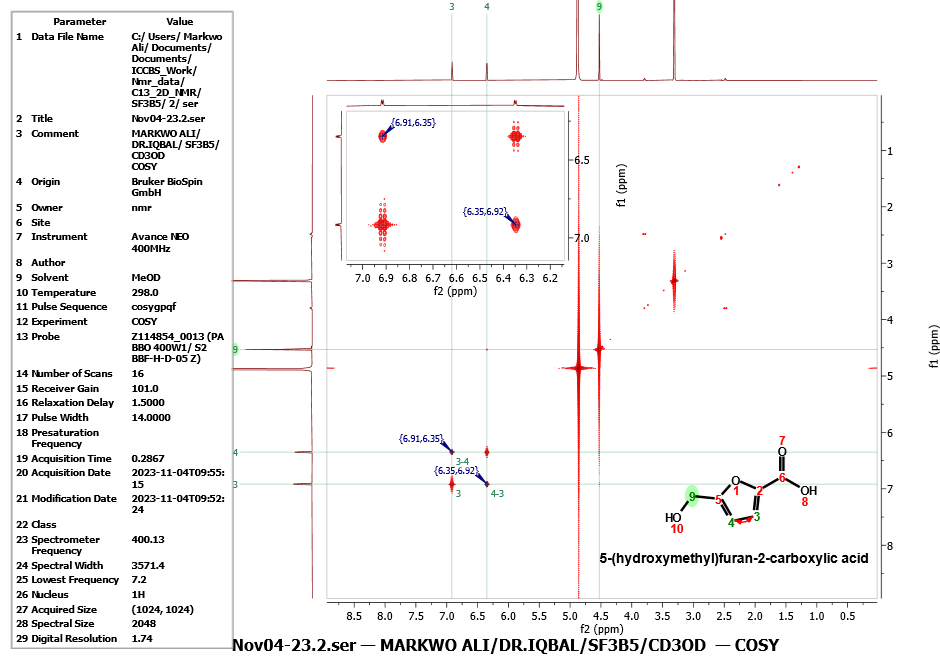


**Figure S19: COSY Spectrum of Compound 4 (SF3B5) in MeOD Acquired on an AVNeo Bruker BioSpin GmbH Instrument.** The COSY spectrum reveals correlations between protons at δ 6.92 (d, 1H), 6.35 (d, 1H), and 4.53 (s, 2H). Spectral comparison with the NIST library indicates a strong similarity to 5-(hydroxymethyl) furan-2-carboxylic acid, suggesting that the observed correlations are characteristic of this compound's structural features.


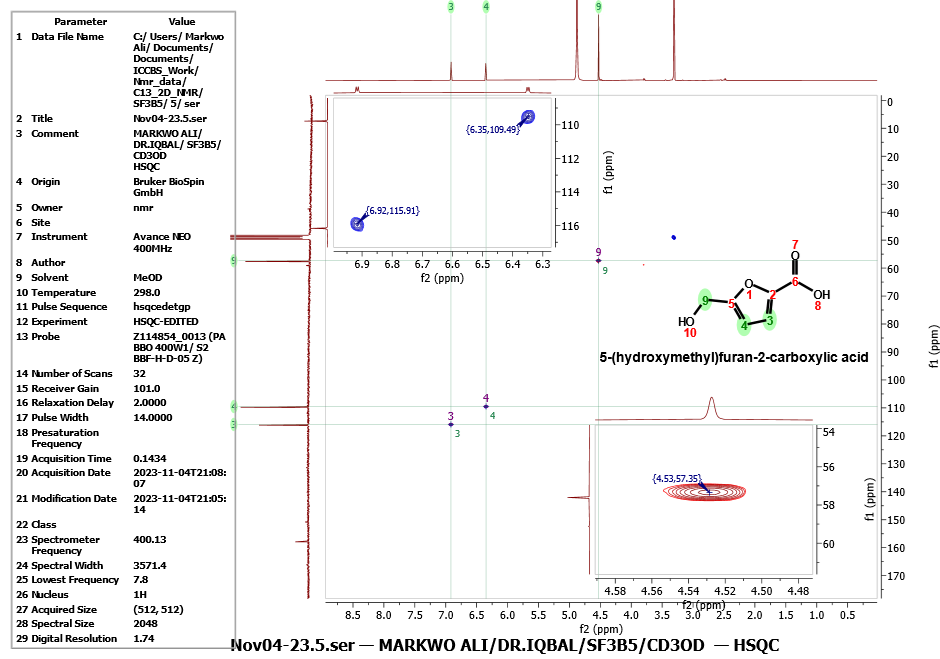


**Figure S20: HSQC Spectrum of Compound 4 (SF3B5) in MeOD Acquired on an AVNeo Bruker BioSpin GmbH Instrument**. The HSQC spectrum displays one-bond correlations between protons and carbons, with notable correlations at δ 6.92 (d, 1H)/σ 116.17, 6.35 (d, 1H)/σ 109.78, and 4.53 (s, 2H)/σ 57.61. Spectral comparison with the NIST library indicates a strong similarity to 5-(hydroxymethyl) furan-2-carboxylic acid, suggesting that the observed correlations are indicative of this compound's structural features.


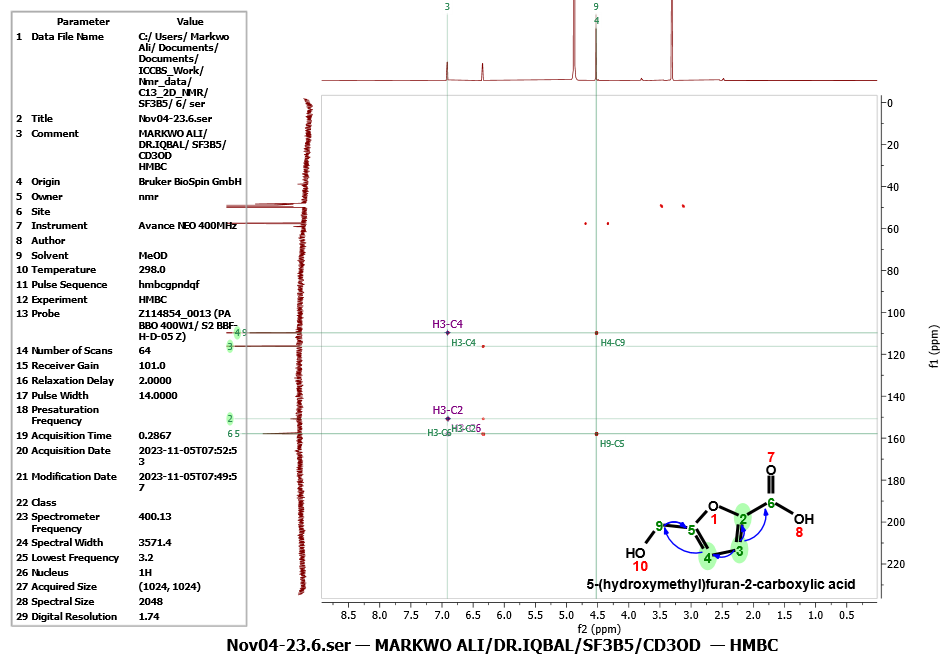


**Figure S21: HMBC Spectrum of Compound 4 (SF3B5) in MeOD Acquired on an AVNeo Bruker BioSpin GmbH Instrument.** The HMBC spectrum reveals long-range proton-carbon correlations, with notable correlations at δ 6.92 (d, 1H)/σ 166.13, 6.35 (d, 1H)/σ 157.89, and 4.53 (s, 2H)/σ 150.78. Spectral comparison with the NIST library indicates a strong similarity to 5-(hydroxymethyl) furan-2-carboxylic acid, suggesting that the observed correlations are characteristic of this compound's structural features.


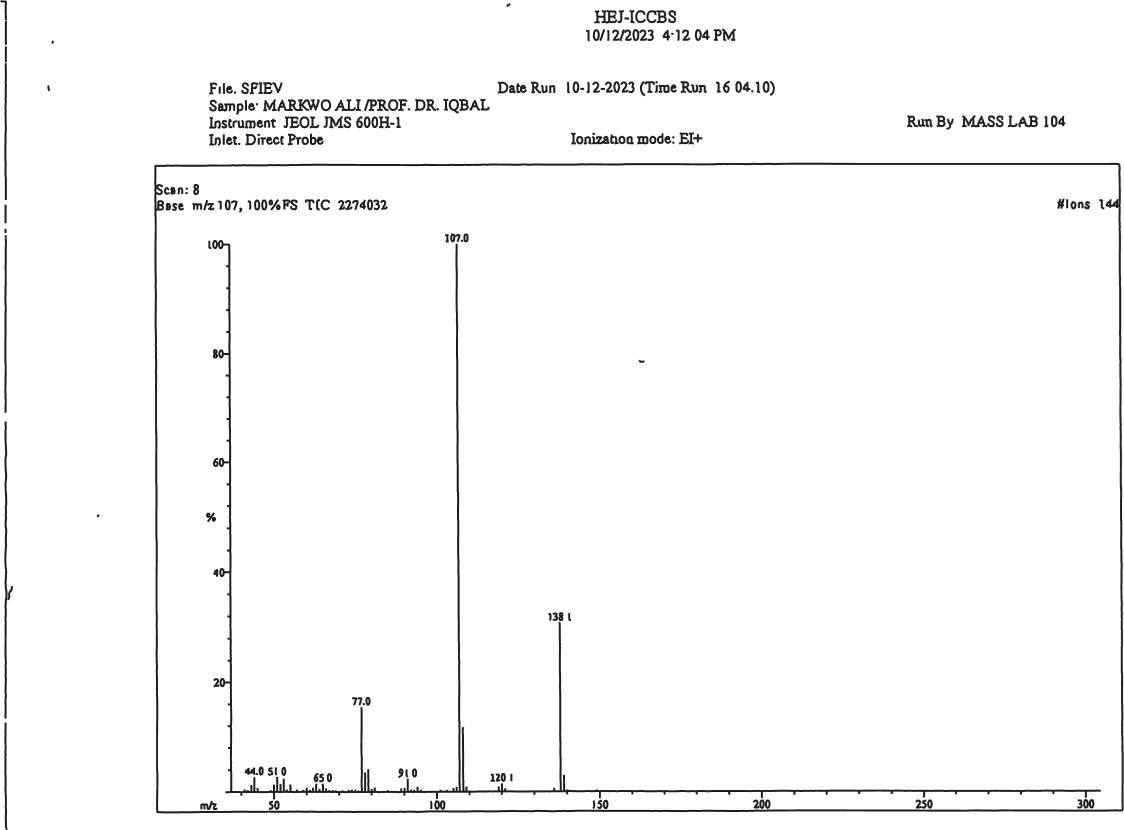


**Figure S22: Mass Spectrum of Compound 5 (SFIEV).** The mass spectrum of SFIEV, acquired using a JEOL JMS 600H-1 instrument, exhibits significant peaks at m/z 138.1, 120.1, 107.0, 91.0, 77.0, 65.0, 51.0, and 44.0. The molecular ion (M+•) peak is observed at m/z 138.1.


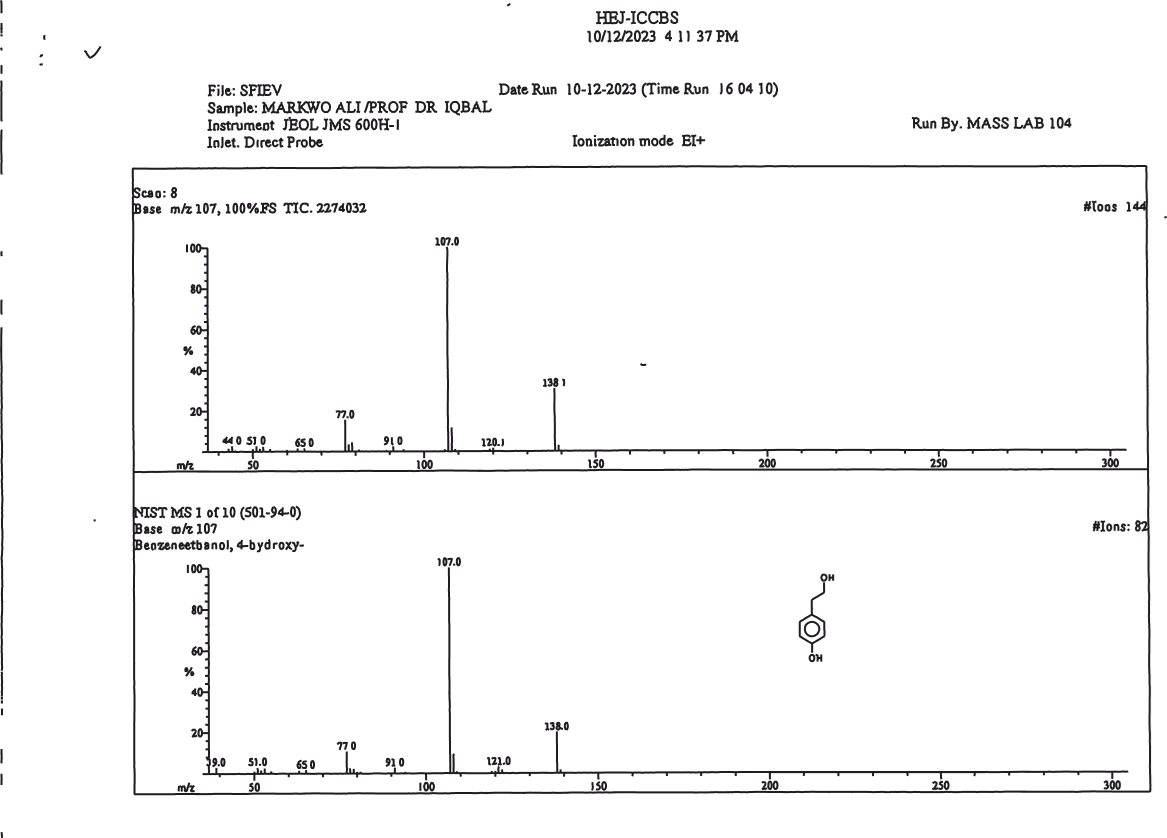


**Figure S23: Comparative Mass Spectrum Analysis of Compound 5 (SFIEV) with NIST Standard for 4-(2-hydroxyethyl) phenol.** Comparison of the mass spectrum of SFIEV, obtained using a JEOL JMS 600H-1 instrument, with the NIST standard spectrum for 4-(2-hydroxyethyl) phenol reveals prominent peaks at m/z 138.1, 120.1, 107.0, 91.0, 77.0, 65.0, 51.0, and 44.0, suggesting a close resemblance in the fragmentation pattern.


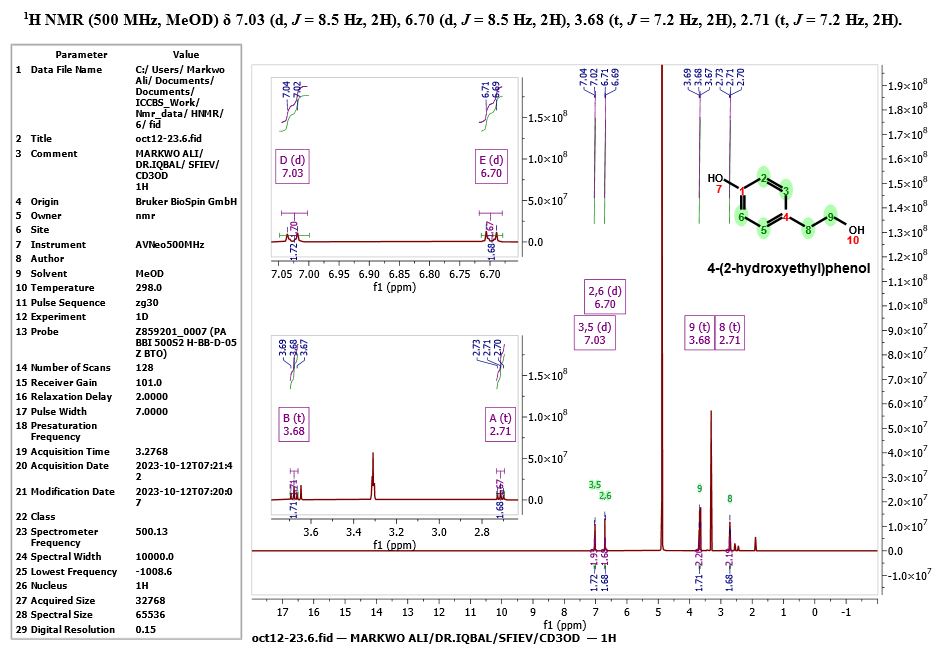


**Figure S24: Proton Spectrum of compound 5 (SFIEV) in MeOD**. The proton spectrum of SFIEV in MeOD, acquired on an AVNeo Bruker BioSpin GmbH instrument operating at 500 MHz, exhibits peaks at δ 7.03, 6.70, 3.68, and 2.71. Spectral comparison with the NIST library indicates a strong similarity to 4-(2-hydroxyethyl) phenol.


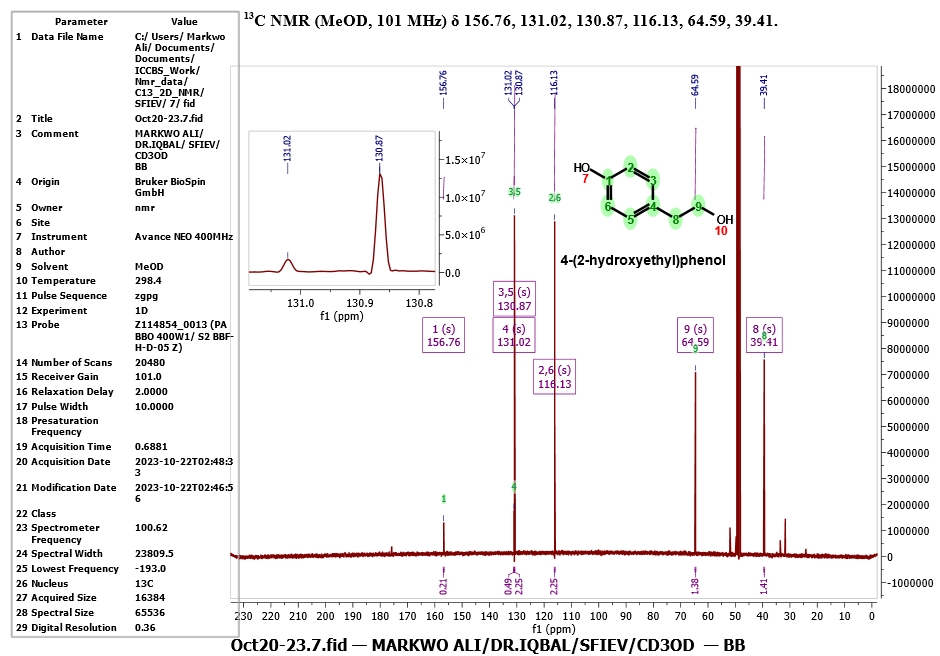


**Figure S25: Carbon-13 NMR Spectrum of compound 5 (SFIEV) Recorded on an Avance NEO 400 MHz Instrument in MeOD.** Peaks Observed at 156.76, 131.01, 130.87, 116.13, 64.59, and 39.41 ppm. An expanded inset highlighting the close peaks at 131.02 and 130.87 ppm is placed in the upper left corner. spectral comparison indicates strong similarity with 4-(2-hydroxyethyl) phenol.


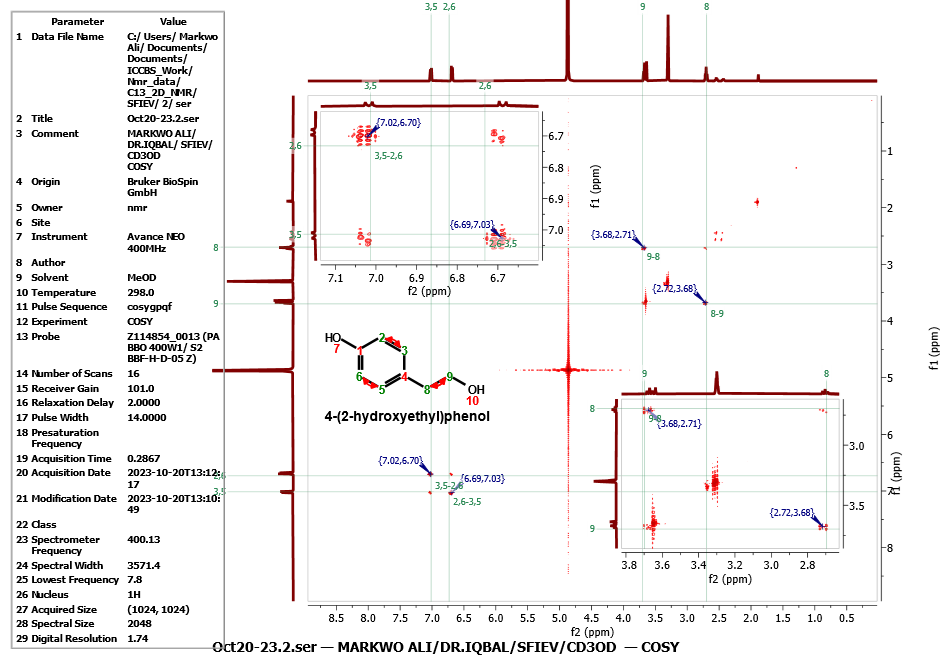


**Figure S26: COSY Spectrum of compound 5 (SFIEV) in MeOD Recorded on an AVNeo Bruker BioSpin GmbH Instrument Operating at 500 MHz.** The Spectrum Reveals Correlations Between Proton Signals, Providing Detailed Connectivity Information. Spectral Analysis Suggests Strong Similarity with 4-(2-hydroxyethyl) phenol.


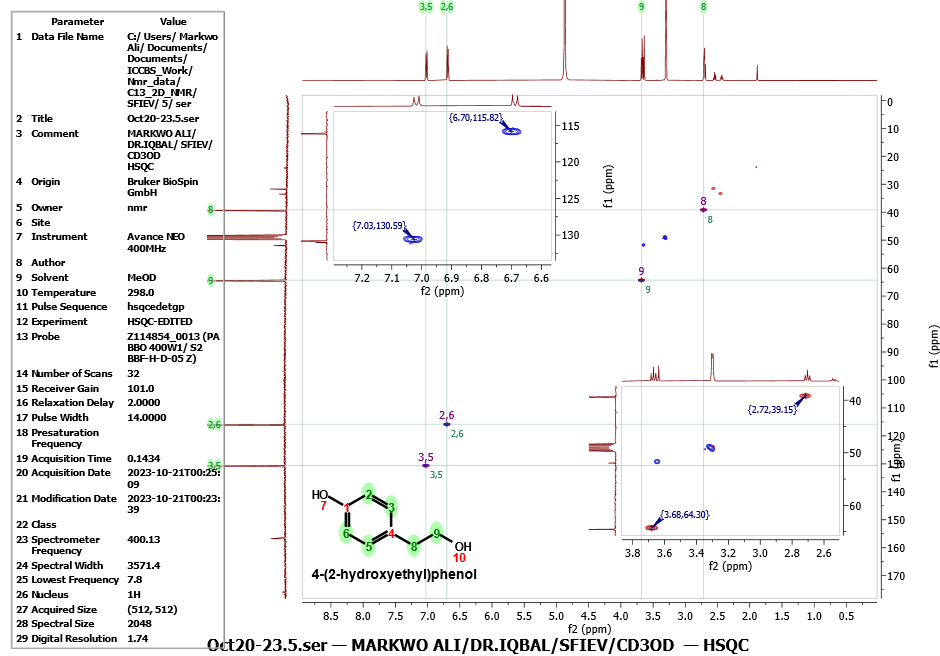


**Figure S27: HSQC Spectrum of compound 5 (SFIEV) in MeOD Obtained on an AVNeo Bruker BioSpin GmbH Instrument.** This spectrum illustrates one-bond correlations between proton and carbon signals. spectral analysis indicates strong similarity with 4-(2-hydroxyethyl) phenol.


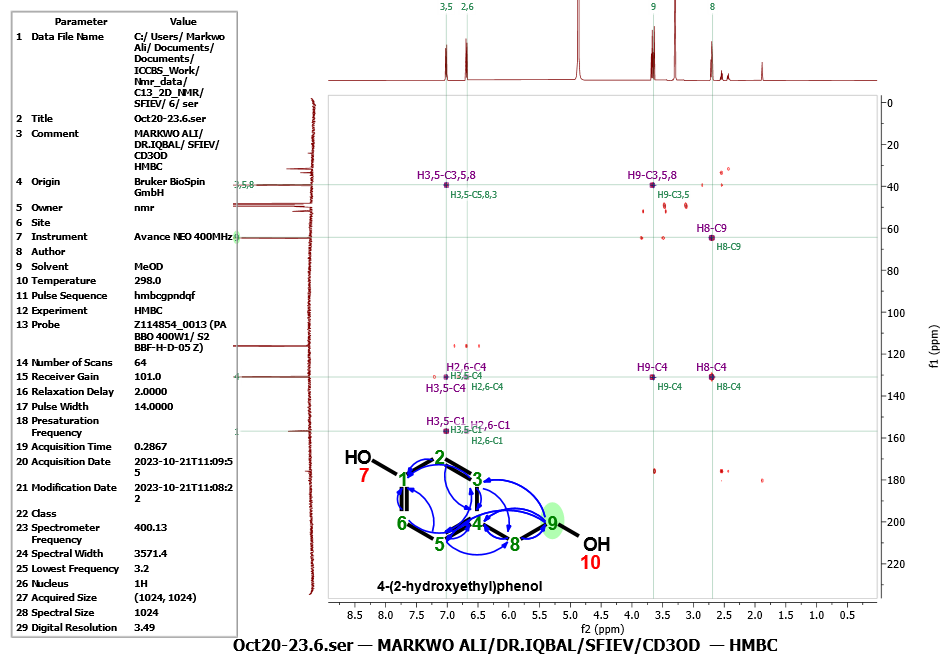


**Figure S28: HMBC Spectrum of compound 5 (SFIEV) in MeOD Acquired on an AVNeo Bruker BioSpin GmbH Instrument.** This spectrum highlights long-range heteronuclear couplings, providing insight into the carbon-carbon connectivity. spectral comparison shows strong similarity with 4-(2-hydroxyethyl) phenol.


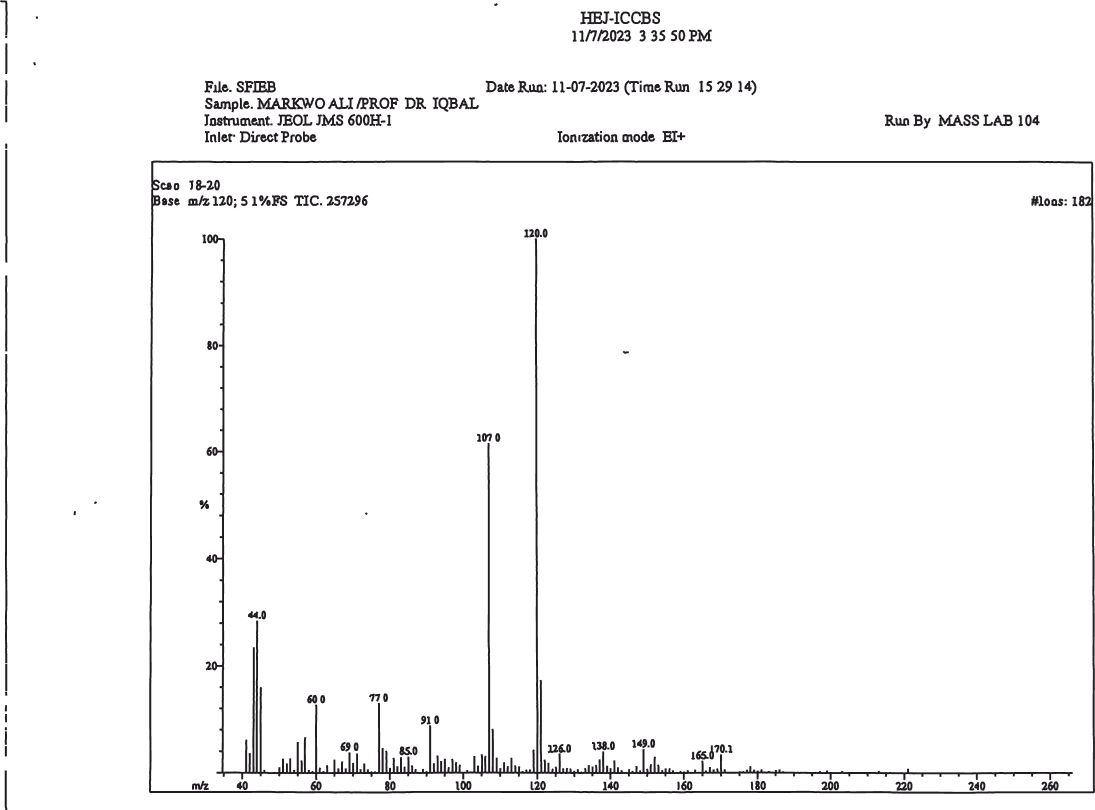


**Figure S29: Mass Spectrum of Compound 6 (SFIEB) Acquired Using a JEOL JMS 600H-1 Instrument.** The spectrum exhibits prominent peaks at m/z 170.1, 165.0, 149.0, 138.0, 126.0, 120.0, 107.0, 91.0, 85.0, 77.0, 69.0, 60.0, and 44.0. Despite its instability and faint visibility in the spectrum, the molecular ion (M+•) peak at m/z 179.0 was employed for subsequent structural elucidation.


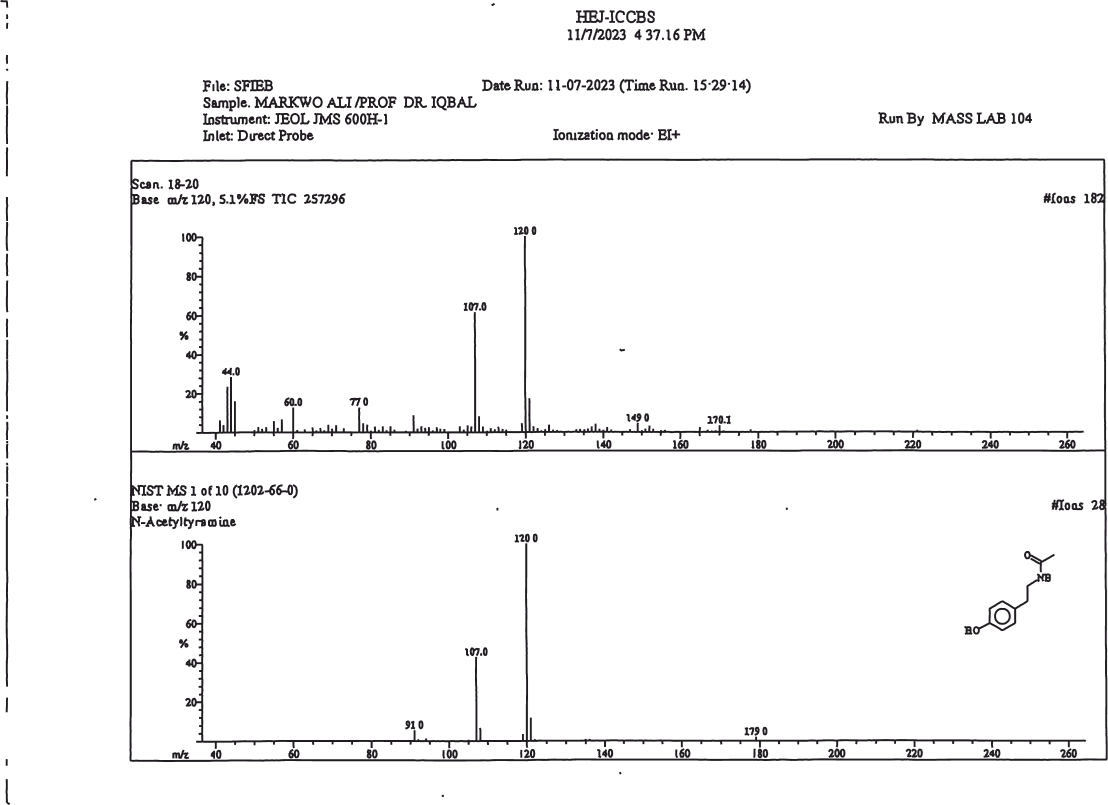


**Figure S30: Mass Spectrum of Compound 6 (SFIEB) Acquired Using a JEOL JMS 600H-1 Instrument.** The spectrum exhibits prominent peaks at m/z 170.1, 165.0, 149.0, 138.0, 126.0, 120.0, 107.0, 91.0, 85.0, 77.0, 69.0, 60.0, and 44.0. Despite its instability and faint visibility in the spectrum, the molecular ion (M+•) peak at m/z 179.0 was employed for subsequent structural elucidation. Matching against the NIST spectral database revealed a close similarity to N-acetyl tyramine.


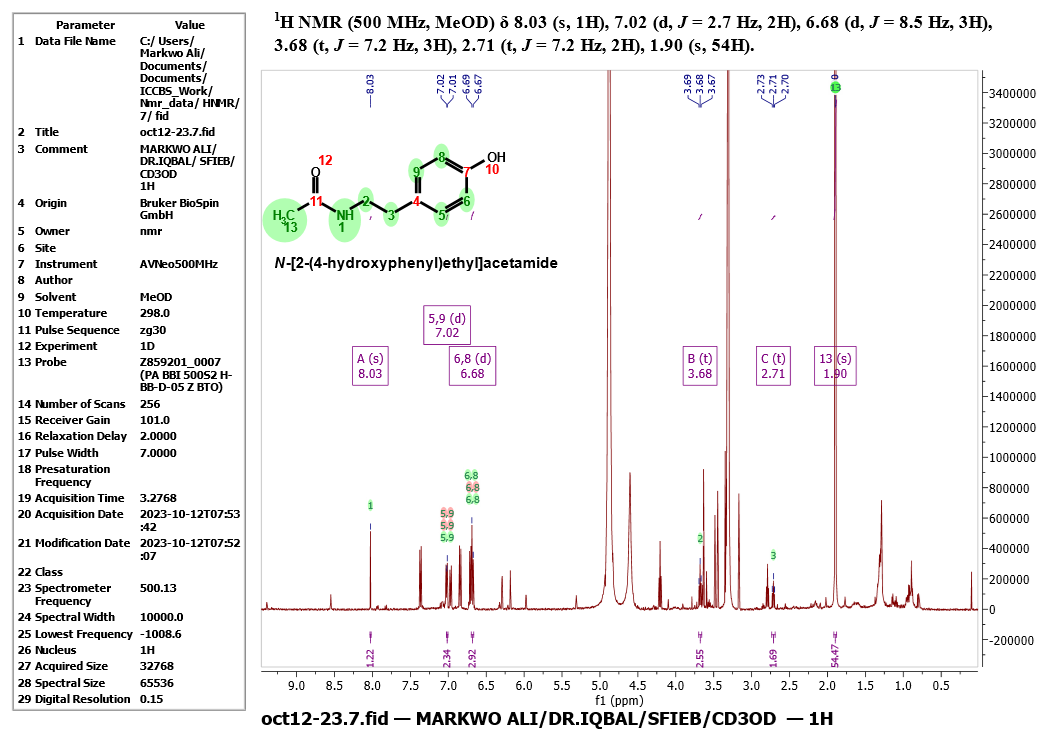


**Figure S31: Proton Spectrum of Compound 6 (SFIEB) in MeOD. Recorded on an AVNeo Bruker BioSpin GmbH 500 MHz instrument, the spectrum in MeOD (δ in ppm) shows peaks at 8.03 (s, 1H), 7.02 (d, J = 2.7 Hz, 2H), 6.68 (d, J = 8.5 Hz, 3H), 3.68 (t, J = 7.2 Hz, 3H), 2.71 (t, J = 7.2 Hz, 2H), and 1.90 (s, 54H), consistent with the structure of N-[2-(4-hydroxyphenyl) ethyl] acetamide. Unidentified peaks may stem from sample impurities or other compounds.**


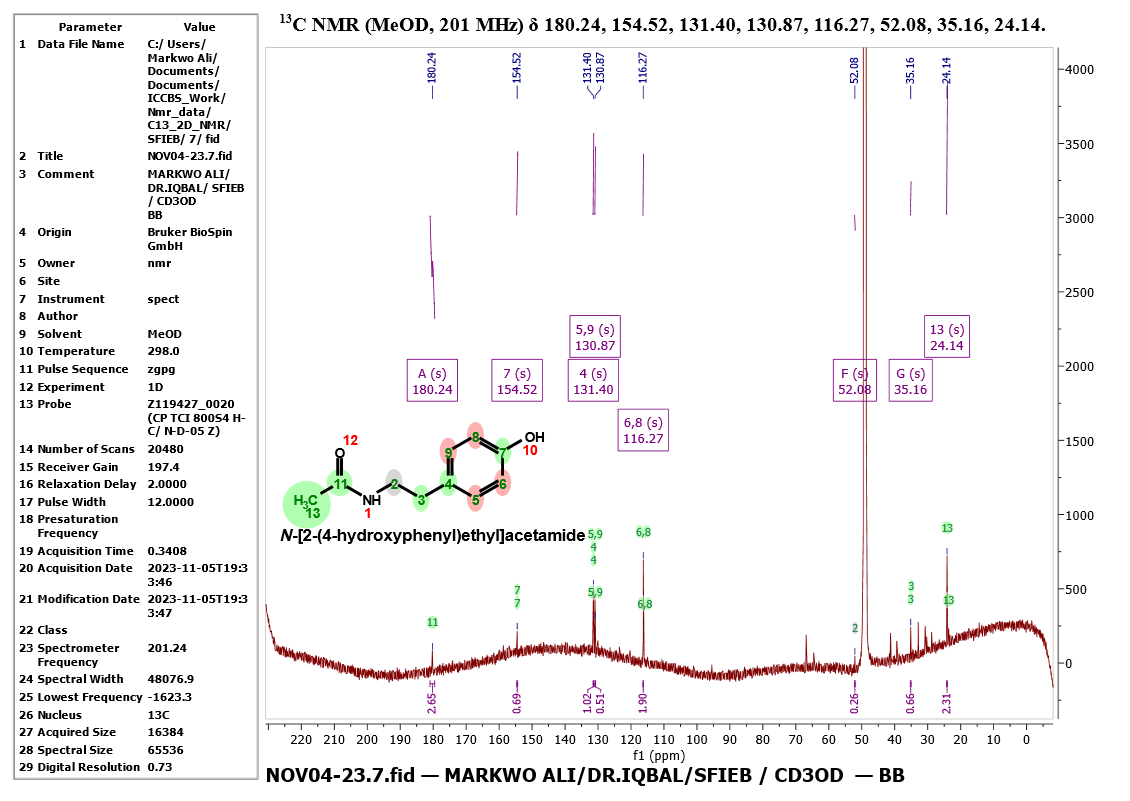


**Figure S32: Carbon-13 Spectrum of Compound 6 (SFIEB) in MeOD**. Recorded on an AVNeo Bruker BioSpin GmbH 500 MHz instrument, the spectrum in MeOD (δ in ppm) shows peaks at 180.24, 154.52, 131.40, 130.87, 116.27, 52.08, 35.16, and 24.14, consistent with the structure of N-[2-(4-hydroxyphenyl) ethyl] acetamide. Unidentified peaks may stem from sample impurities or other compounds.


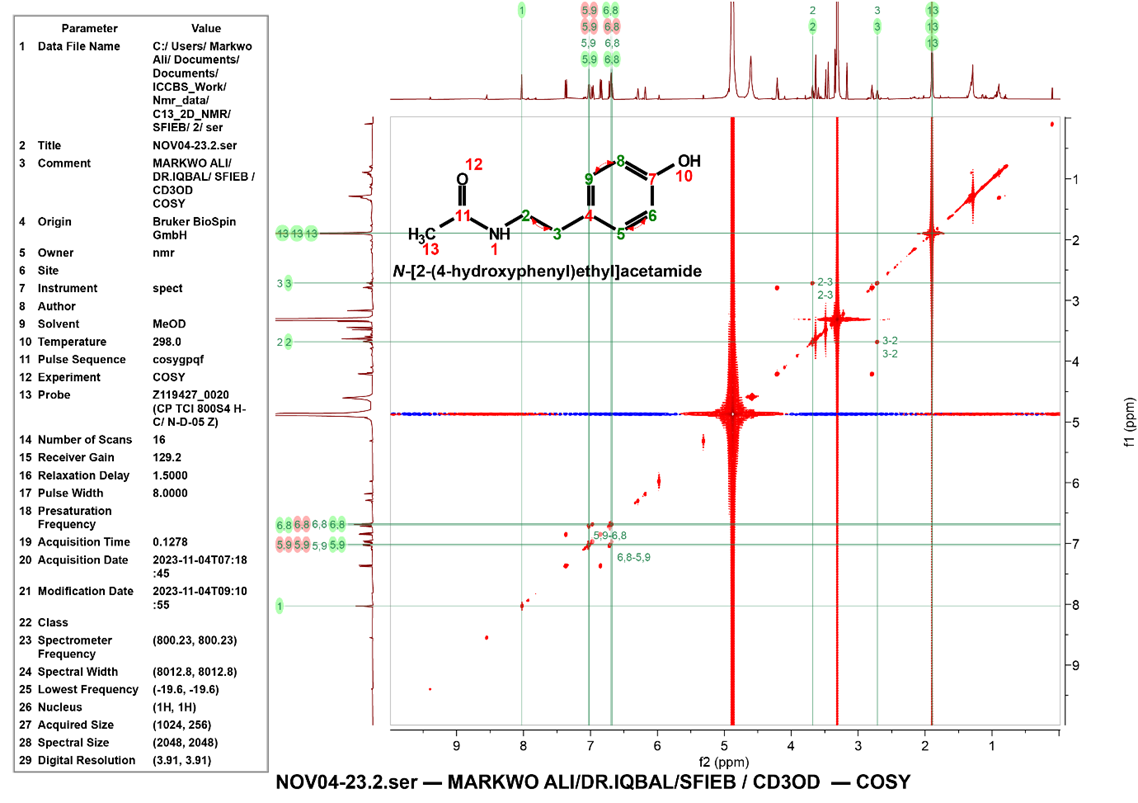


**Figure S33: COSY Spectrum of Compound 6 (SFIEB) in MeOD**. Recorded on an AVNeo Bruker BioSpin GmbH 500 MHz instrument, the COSY spectrum shows cross-peaks corresponding to proton couplings consistent with the structure of N-[2-(4-hydroxyphenyl)ethyl]acetamide. Unidentified cross-peaks may stem from sample impurities or other compounds.


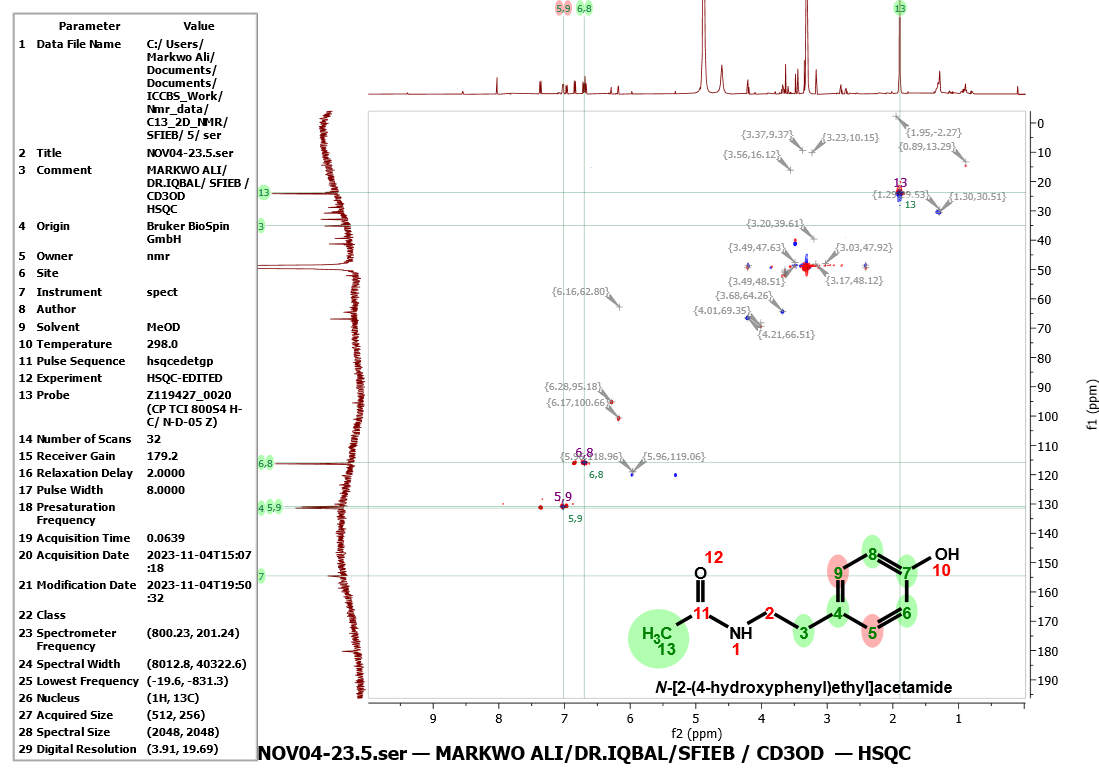


**Figure S34: HSQC Spectrum of Compound 6 (SFIEB) in MeOD.** Recorded on an AVNeo Bruker BioSpin GmbH 500 MHz instrument, the HSQC spectrum shows correlations between proton and carbon signals at the following chemical shifts (δ in ppm): 1H NMR (500 MHz, MeOD) δ 8.03 (s, 1H), 7.02 (d, J = 2.7 Hz, 2H), 6.68 (d, J = 8.5 Hz, 3H), 3.68 (t, J = 7.2 Hz, 3H), 2.71 (t, J = 7.2 Hz, 2H), 1.90 (s, 54H); 13C NMR (201 MHz, MeOD) δ 180.24, 154.52, 131.40, 130.87, 116.27, 52.08, 35.16, and 24.14, consistent with the structure of N-[2-(4-hydroxyphenyl)ethyl]acetamide. Unidentified correlations may stem from sample impurities or other compounds.


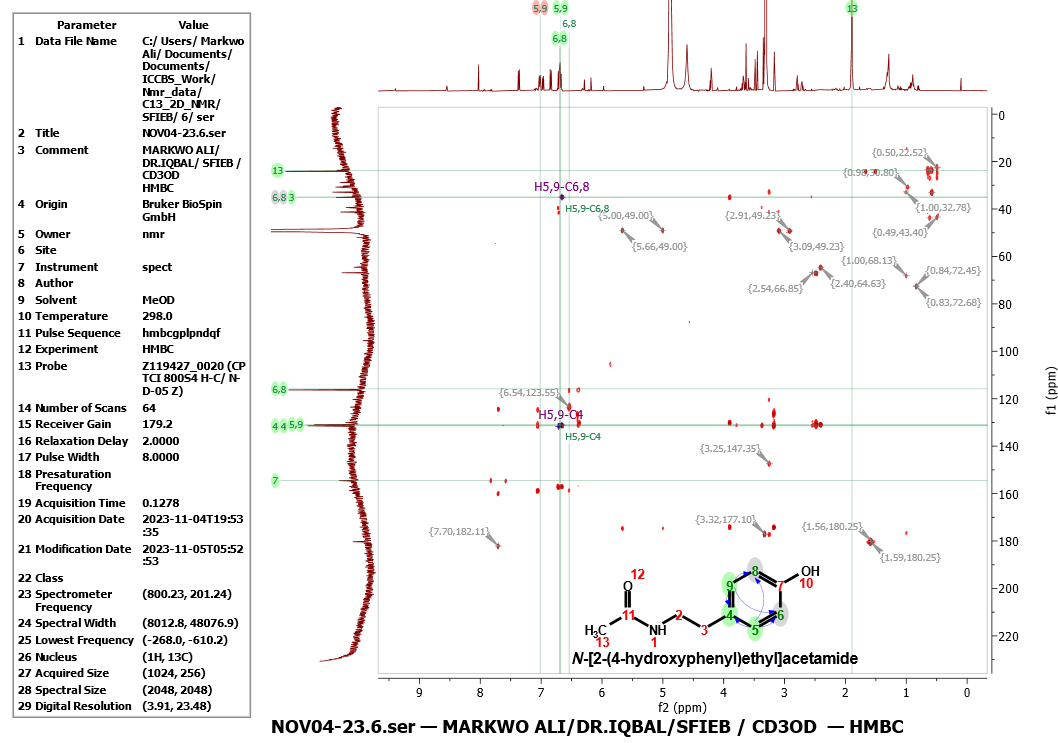


**Figure S35: HMBC Spectrum of Compound 6 (SFIEB) in MeOD**. Recorded on an AVNeo Bruker BioSpin GmbH 500 MHz instrument, the HMBC spectrum shows long-range proton-carbon correlations at the following chemical shifts (δ in ppm): 1H NMR (500 MHz, MeOD) δ 8.03 (s, 1H), 7.02 (d, J = 2.7 Hz, 2H), 6.68 (d, J = 8.5 Hz, 3H), 3.68 (t, J = 7.2 Hz, 3H), 2.71 (t, J = 7.2 Hz, 2H), 1.90 (s, 54H); 13C NMR (201 MHz, MeOD) δ 180.24, 154.52, 131.40, 130.87, 116.27, 52.08, 35.16, and 24.14, consistent with the structure of N-[2-(4-hydroxyphenyl)ethyl]acetamide. Unidentified correlations may stem from sample impurities or other compounds.
